1  
2  
3  
4  
5  
6  
7  
8  
9  
10  
11  
12  
13  
14  
15

**Facile assembly of an affordable  
miniature multicolor fluorescence microscope  
made of 3D-printed parts enables detection of single cells**

Samuel B. Tristan-Landin<sup>1¶</sup>, Alan M. Gonzalez-Suarez<sup>1¶</sup>, Rocio J. Jimenez-Valdes<sup>1</sup>,  
Jose L. Garcia-Cordero<sup>1\*</sup>

<sup>1</sup>Unidad Monterrey, Centro de Investigación y de Estudios Avanzados del IPN, Parque PIIT, Apodaca,  
Nuevo León, CP. 66628, Mexico.

\*Corresponding author

E-mail: [jlgarcia@cinvestav.mx](mailto:jlgarcia@cinvestav.mx)

<sup>¶</sup>These authors contributed equally to this work

16

## 17 **Abstract**

18 Fluorescence microscopy is one of the workhorses of biomedical research and laboratory diagnosis;  
19 however, their cost, size, maintenance, and fragility has prevented their adoption in developing countries  
20 or low-resource settings. Although significant advances have decreased their size, cost and accessibility,  
21 their designs and assembly remain rather complex. Here, inspired on the simple mechanism from a nut and  
22 a bolt we report the construction of a portable fluorescence microscope that operates in bright field mode  
23 and in three fluorescence channels: UV, green, and red. It is assembled in under 10 min from only six 3D  
24 printed parts and basic electronic components that can be readily purchased in most locations or online for  
25 US \$85. Adapting a microcomputer and a touch LCD screen, the microscope can capture time-lapse images  
26 and videos. We characterized its resolution and illumination conditions and benchmarked its performance  
27 against a high-end fluorescence microscope by tracking a biological process in single cells. We also  
28 demonstrate its application to image cells inside a microfluidic device in bright-field and fluorescence  
29 mode. Our microscope fits in a CO<sub>2</sub> chamber and can be operated in time-lapse mode. Our portable  
30 microscope is ideal in applications where space is at a premium, such as lab-on-a-chips or space missions,  
31 and can find applications in clinical research, diagnostics, telemedicine and in educational settings.

32

33

## 34 **Introduction**

35 Fluorescence microscopy is an essential tool in biomedical research used to visualize, analyze and study  
36 molecules, cells and tissues. One of its main applications is to enable the quantification and localization of  
37 the distribution of cellular components [1], which enables quantitative biology. Other important  
38 applications include its usage as a readout mechanism in biochemical assays such immunoassays or qPCR.  
39 In the healthcare sector, fluorescence microscopy has been recommended by the World Health Organization  
40 for the diagnosis of tuberculosis [2]. However, because of its cost, training, maintenance and fragility,  
41 conventional fluorescence microscopes remain out of reach in developing countries, in rural areas and in  
42 remote settings [3–6]. Thus, access to affordable fluorescence microscopes (albeit at the cost of  
43 compromising certain functionalities and resolution) can facilitate its deployment in these settings and its  
44 usage in point-of-care diagnostics, telemedicine, and environmental monitoring, benefitting global  
45 healthcare. Furthermore, producing affordable and easy-to-assemble laboratory tools and instrumentation  
46 could facilitate research, produce quality results [7], improve laboratory productivity [8], and can  
47 potentially lead to new discoveries in biology, physiology, chemistry, and biomedicine [9,10].

48 Affordability and portability in fluorescence microscopy has been accomplished by retrofitting optical  
49 elements (objectives, filters, LEDs, lasers, lenses, mirrors) and 3D-printed parts to smartphones cameras  
50 [3,5,11–13]. However, smartphones, although extremely powerful and unique, are difficult to reconfigure  
51 and take apart [14]; evolve at a rapid pace which may render them obsolete; constant software updates on  
52 the operating systems may disrupt their performance [15]; their size hampers further miniaturization and  
53 interferes in the integration with other additaments or sensors; and are not optimized for long-term  
54 biological experimentation [16]. A different approach has been to use regular cameras (webcams or digital  
55 cameras) placed in a framework made of plastic parts, metallic hardware, and 3D-printed parts [5,6,16,17];  
56 however, in some cases, the complexity of their designs encumbers downstream integration with other 3D  
57 printed parts and the amount of pieces needed to put it together may be overwhelming for a newcomer or

58 for technologists trying to develop affordable instrumentation in low-resource settings. It also hampers its  
59 prompt adoption by scientists who are setting up a laboratory with limited resources and who need a multi-  
60 channel fluorescence microscope with basic functionalities and sufficient quality for most biological  
61 applications.

62 To solve some of these issues, we introduce a low-cost and portable multicolor fluorescence microscope  
63 the size of a cube with a side length of 3 cm. Its operation and framework are inspired in the mechanism of  
64 a nut and bolt. The microscope is assembled from only six 3D-printed parts, 4 power LEDs, an 8MP CMOS  
65 camera, a metallic rod, and a PCB with basic electronics. Aside from the Foldscope [18] (which does not  
66 contain any camera sensor), our microscope is assembled using the least amount of pieces possible. After  
67 pieces are 3D-printed and the PCB manufactured, the microscope can be assembled in 10 min (see **S1**  
68 **Video**) with the capability to acquire images in brightfield and 3 color fluorescence channels. We present  
69 its operation, characterization of its illumination homogeneity in each of the fluorescence channels, and its  
70 demonstration in a cellular biological assay where it is possible to track single cells captured in microwells.

71

## 72 **Materials and methods**

### 73 **3D-Printing Chassis**

74 Microscope parts were designed in Inventor (ver 2017, Autodesk) and fabricated in a 3D printer (Makerbot  
75 Replicator 2); see **S1 Fig**. Dimensions of the microscope tube are shown in **S2 Fig**. The parts are made of  
76 black polylactic acid (PLA) and printed with the following settings: speed in X and Y axis of 40 mm/s,  
77 temperature of 230°C, layer thickness of 200  $\mu\text{m}$ , and infill of 10%. Once fabricated, pieces were manually  
78 assembled; see **S1 Video** for a step-by-step assembly.

79

80

## 81 **Electronics and optical components**

82 The optical system relies on the Raspberry Pi Camera Module V2 that comes with an 8-MegaPixel CMOS  
83 image sensor camera and a plastic lens. This lens comes with the camera and no further specifications are  
84 given on it; however, US Patent 7,564,635 B1 provides the description of a lens that has the same focal  
85 length (3.04 mm) provided in the specification of this camera module. High brightness LEDs (white, UV,  
86 green and blue) were used to illuminate the sample. Plastic color filters (Roscolux) or single-band pass  
87 optical filters (Zeiss) were used as emission filters and placed between the image sensor and the lens. A  
88 custom printed circuit board (PCB) containing the electronic components to control the LEDs were placed  
89 below the camera. The schematic and the list of components can be found in **S3 Fig** and **S1 Table**,  
90 respectively.

## 91 **Graphical User Interface (GUI)**

92 A single-board computer (Raspberry Pi) was used to control the LEDs and to program a graphical  
93 interface using Python and OpenCV. The GUI allowed to acquire images and control different parameters  
94 such as the exposure time (**S4 Fig**).

## 95 **Cell assays**

96 To compare image quality acquired with our microscope and a conventional microscope, THP-1 cells  
97 were permeabilized with Tween-20 (P1379, Sigma Aldrich) 0.05% in PBS 1X for 15 min, centrifuged at  
98 1,200 rpm for 5 min, and washed with PBS 1X. Next, cells were either incubated for 20 min either with  
99 DAPI (2.9  $\mu$ M, 62247, Thermo Fisher Scientific) or Calcein-AM (20  $\mu$ M, C1359, Sigma Aldrich), or for  
100 10 min with Ethidium Homodimer (16  $\mu$ M, EthD-1, E1903 Sigma Aldrich). The cells were washed again  
101 with PBS 1X and centrifuged at 1200 rpm for 5 min. Then, 20  $\mu$ L of the cellular suspensions were spread  
102 over three different clean coverslips, allowed to dry, and incubated with 10  $\mu$ L of glycerol. Finally, a second  
103 coverslip was placed on the top of the samples. For Calcein-AM stained cells, PBS 1X was used instead  
104 of glycerol. Finally, both coverslips were sealed with enamel.

## 105 **Neutrophil assay**

106 Human peripheral-blood neutrophils were purified from human blood by a non-continuous Percoll  
107 density gradient. After purification, neutrophils nuclei were stained with Hoechst 33342 (H3570, Thermo  
108 Fisher Scientific) at 16.2  $\mu\text{M}$  for 5 min. Neutrophils were stimulated with either Hank's solution (control)  
109 or with *E. coli* lipopolysaccharide (LPS at 100  $\mu\text{g}/\text{mL}$ , L2755, Sigma Aldrich). Both solutions contained  
110 also Sytox Orange (S11368, Thermo Fisher Scientific) at 5  $\mu\text{M}$  for nucleic acid staining. See Supplementary  
111 Information for further details. Cells were placed in three PDMS-devices containing microwells (20  $\mu\text{m}$   
112 diameter, 20  $\mu\text{m}$  height). One of the devices was placed on the miniature microscope with the stimulus  
113 solution and the other two on an inverted fluorescence microscope (Axio Observer, Zeiss). 20  $\mu\text{L}$  of the  
114 cell suspension was added to the three devices. After 5 min, 20  $\mu\text{L}$  of the stimulus were added to two  
115 devices, one in our microscope and the other in the Zeiss microscope. 20  $\mu\text{L}$  of Hank's solution was added  
116 to the other device sitting on the Zeiss microscope, which served as a negative control. Next, images in  
117 brightfield and red and blue fluorescence channels were acquired every 10 min in both microscopes. Images  
118 were analyzed using an image processing software (Fiji) where fluorescence intensity was measured over  
119 time for all individual microwells.

## 120 **Cell tracking in a microfluidic device**

121 A one-channel microfluidic device was designed in AutoCAD (Student version, Autodesk) and fabricated  
122 by soft-lithography [19]. The device consists of an inlet, an outlet, and a long serpentine channel with a  
123 height and width of 20 and 40  $\mu\text{m}$ , respectively. The device was placed on the miniature microscope stage  
124 and a THP-1 cell suspension, stained with Calcein-AM, was flowed into the channel using a 1 mL syringe.  
125 The center of the device was focused, and a video was recorded in bright-field and in the green fluorescence  
126 channel while the cells were flowing through the serpentine channel.

127

128

## 129 **THP-1 culture and time lapse microscopy**

130 THP-1 cells were incubated using supplemented RPMI-1640 medium (11875093, Thermo Fisher  
131 Scientific) inside a T25 flask before experimentation. A 1 mL chamber was fabricated using a PDMS slab,  
132 plasma bonded to a cover slide and exposed to UV light for 3 hours. 900  $\mu$ L of fresh media was added to  
133 the chamber followed by 100  $\mu$ L of THP-1 cell suspension at  $100 \times 10^5$  cell/mL. Another block of PDMS  
134 was used to seal the chamber from the top. The cell chamber was placed on the miniature microscope stage  
135 and the whole microscope inside a cell culture incubator at 37°C with 5% CO<sub>2</sub>. The bottom of the chamber  
136 was manually focused, and the miniature microscope was set in time-lapse mode on the GUI. Next, all  
137 cables were disconnected, except for the power cord. During the first ~24 hours, brightfield images were  
138 acquired every 15 min. For the last ~2 hours, images acquisition was set to every minute.

139

## 140 **Results and discussion**

### 141 **Microscope Design**

142 Our goal was to engineer a miniature multicolor fluorescence microscope of simple design that could be  
143 built from the least number of pieces and thus be assembled rapidly, and which, while using 3D printed  
144 pieces, could still offer enough accuracy to focus on objects while being mechanically stable and indifferent  
145 to vibrations. Importantly, our goal was not to develop a fluorescence microscope that offered the same  
146 illumination and image quality as a commercial microscope but rather a microscope that could be assembled  
147 in a short period of time, was affordable for low-budgets labs, offered sufficient image quality for most  
148 applications (with enough resolution to image single cells) and enable quantitative biological  
149 measurements, and equally important, that it was simple enough for any scientist to observe biological  
150 objects in brightfield and stained with multiple fluorescent dyes.

151 The microscope is inspired in the mechanism of a nut and bolt, **Fig 1a**. The bolt head serves as a base  
152 and as a casing to enclose the sensor camera, while the tip of the bolt holds the plastic lens, **Fig 1b,c**. The  
153 nut functions as a stage that fits on the threaded shank, supports the samples, and serves as a lid for  
154 fluorescence observations (**Fig 1d**). The threading in the shank is 1 mm (**S2 Fig**). It is important to realize  
155 that because the microscope is made of PLA, the threading can wear out over time and thus decrease its  
156 ability to finely focus. The microscope base (bolt) is fixed while the stage rotates to bring the object into  
157 focus. One disadvantage of this arrangement is that the object under observation is rotated with the stage,  
158 yet once focused the object can be manually lifted from the stage and rotated to preserve the orientation.

159

160

161 **Fig 1. Anatomy of the miniature microscope.** (a) The mechanism of the microscope is inspired by how  
162 a nut and bolt works. (b) Front view of the microscope. (c) Cutaway diagram of the microscope. (d)  
163 Exploded view of the different components comprising the microscope. (e) Photograph of the microscope  
164 with the lid open and a microfluidic device mounted on the stage. Schematic of the light path during  
165 operation of the microscope in (f) brightfield and (g) fluorescence mode. Color LEDs can be placed at  
166 different angles (0-45°) to provide a homogeneous illumination.

167

168 Most fluorescence microscope configurations make use of fluorescence detection cubes (exciter, dichroic,  
169 and emitter) incorporated in a filter wheel. Because LEDs have a very narrow band spectrum (20-40 nm)  
170 it is possible to omit the detection cube and just keep the emission filter. Thus, the stage performs as a lid  
171 that enables brightfield observation using a white LED placed on the center top of the lid (**Fig 1e**) and  
172 allows fluorescence measurements using 3 high-power color LEDs (UV: 385 nm, Green: 475 nm, and  
173 Blue:535 nm) that illuminates the sample from the sides (**Fig 1f**) Three plastic emission filters are placed  
174 on a hollowed-out tray that slides on the shank of the microscope and in which one of the hollows remains



175 empty for brightfield illumination. With a small modification to the shank, regular microscope optical filters  
176 can be also employed. The simplicity of our configuration contrasts with other microscopes that require  
177 several 3D-printed parts [17] or acrylic parts, nut, bolts, and tubes, for their assembly [16,20].

178

## 179 **Microscope Parts**

180 The microscope objective consists of a plastic lens detached from a commercial camera module and  
181 placed upside-down 25.4 mm above an 8 MP CMOS sensor (**Fig 1e**), in a similar configuration to what  
182 others have reported [16,21,22]. The sensor pixels contain three color pigment mosaic filters (Red, Green,  
183 Blue) that serve as extra emission filters by digitally extracting each channel from the raw image [16].

184 Our microscope is assembled from six 3D-printed pieces (a lid, a stage, a shank, front and back casing,  
185 and a tray), a metallic rod, 4 high-power LEDs, a CMOS camera, a lens, and an electronic control unit that  
186 powers the LEDs from a single 9V power supply, see **S1 and S3 Figs**. The 3D printed pieces are fabricated  
187 in 2.5 hours while the microscope is assembled under 10 min. The manual step-by-step assembly of the  
188 microscope are shown in **S1 Video**. Altogether, the size of the microscope is similar to a cube with a side  
189 length of ~3 cm and weighs only 58 g. The total cost of the opto-electro-mechanical system is \$85 (USD),  
190 see **S1 Table**. In comparison, a low-entry commercial microscopes with a single fluorescence module can  
191 cost up to ~\$1900 and weight ~9.5 kg [4]. Because of its popularity and low-cost, we selected the  
192 microcomputer Raspberry Pi to control the microscope and process the images. An added benefit of the  
193 Raspberry Pi platform is the plethora of plug-in sensors and accessories [14] that in the future could improve  
194 the capabilities of our microscope and aid in the automation of biological and biochemical assays. Adding  
195 the cost of the Raspberry Pi and the tablet, the total cost of our microscope increases to US\$202.

196

197

## 198 **Microscope Operation**

199 To operate the microscope, we created a graphical user interface (GUI) in Python that allowed us to turn  
200 on and off on-demand the different color LEDs; set the exposure time; capture still images, videos, or time-  
201 lapse images; save images in different formats; among other functions, **S4 Fig**.

202 **Fig 2** shows the step-by-step operation of the microscope. It involves placing the sample on the stage by  
203 opening the lid. Next, the lid is closed to isolate the sample from external light sources. For brightfield  
204 observations, the white LED is turned on from the GUI and the tray is shifted to match the empty hole of  
205 the tray. The stage is manually rotated clockwise or counterclockwise to focus the objects on the sample.  
206 For fluorescence observations, one of the color LEDs are turned on while the filter tray is manually slid to  
207 match the corresponding emission filter with its corresponding LED. **S2 Video** shows how easily the  
208 microscope is operated by a user.

209

210

211 **Fig 2. Step-by-step operation of the miniature microscope.** (a) The lid is open to place a sample and  
212 then closed to prevent any external light sources to enter the stage and thus affect the image capture process.  
213 (b) Rotating the stage clockwise brings the sample closer to the lens, while rotating it counterclockwise  
214 moves the sample away from the lens. (c) To acquire bright field or fluorescence images, the slider is  
215 moved manually either left or right to match the emission filter with the excitation LED. The leftmost  
216 hollow in the filter tray is kept empty for bright-field observation.

217

## 218 **Microscope Resolution**

219 The field of view of our setup is  $\sim 0.2 \text{ mm}^2$  ( $525 \mu\text{m} \times 394 \mu\text{m}$ ) with an estimated equivalent magnification  
220 of a 20x microscope objective. To achieve different magnifications the distance from the lens to the sensor

221 can be adjusted. The theoretical optical resolution, calculated at 550 nm according to the Rayleigh criterion,  
222 is 0.448  $\mu\text{m}$ . The focal length and working distance of the lens are approximately 2.7 and 0.1 mm,  
223 respectively, and the lens has a numerical aperture of 0.45, while the depth of field is 1.46  $\mu\text{m}$ . To determine  
224 the optical resolution of our system, we determined the full width at half maximum (FWHM) of the point  
225 spread function (PSF) for 40 1- $\mu\text{m}$  fluorescent beads (Firefli Fluorescent Blue) spread over the surface.  
226 The estimated FWHM of the 40 microbeads with our microscope is 1.187  $\mu\text{m}$ , identical the one obtained  
227 with a 20X objective using a Zeiss microscope, **Fig 3a,b**. We also imaged a 1951-USAF resolution target  
228 (R1DS1N, Thorlabs). As seen in **Fig 3c** our microscope can clearly resolve two lines separated by 2.2  $\mu\text{m}$ .

229 A common issue with custom-made microscopes is the radial loss of resolution farther from the center  
230 [21]. This is due to the alignment of the optical elements or of the different pieces that comprise the  
231 microscope. Using the same USAF target we measured the Michelson contrast,  $C_M$  (a measurement of  
232 contrast [23]), along the width of an image. An element is determined to be resolvable if  $C_M \geq 0.1$  [21]. As  
233 shown in **Fig 3d**, the center of the image produces sharper contrasts for all the line sets, though there is a  
234 pronounced decreased of  $C_M$  values on the left side of the image, possibly due to the inclination of the  
235 sample stage of the microscope. Nevertheless, all the line sets of the USAF target produce a  $C_M > 0.3$  even  
236 for patterns as small as 2.2  $\mu\text{m}$ , a sufficient resolution for most cell-based measurements [6,13,16] and for  
237 the detection of some parasites [13].

238

239

240 **Fig 3. Tests to determine the resolution of the microscope.** (a) Representative image of a 1  $\mu\text{m}$   
241 fluorescent bead. (b) Point spread functions of 40 1- $\mu\text{m}$  beads with the blue line representing the average.  
242 (c) Brightfield images of the last 5 elements of group 7 on a 1951 USAF resolution target; see full images  
243 in S6 Fig. Indicated on top is the thickness of each line. Below each image is the line profile as measured

244 at halfway through all the lines. (d) Michelson contrast test using the same USAF target as measured across  
245 the width of the image. Gray dashed line represents the center of the image.

246

## 247 **Microscope Illumination**

248 To correct for uneven illumination intensity from light sources, fluorescence microscopes employ the  
249 Koehler illumination, a set of lenses positioned between the light source and the sample[24]. Simpler  
250 illumination correction systems to project LED light make use of collimator lenses [2], light-pipes, or  
251 elliptical mirrors [25] to generate a parallel beam, or in some cases a diffusor [17] or coupling prisms [2]  
252 to guide the beam, thus improving evenness of illumination but not fully correcting it [25]. Poor  
253 illumination translates into a poor contrast between the sample fluorescence and the background. However,  
254 adding these optical elements adds complexity, cost, and space to any microscopy system.

255 Thus, we wondered whether direct illumination, where the light source (without any optical elements) is  
256 placed near the sample, could give us a uniform illumination. This is a simpler and inefficient configuration  
257 as only a small percentage of the light produced by the LEDs reaches the sample [25], but because we used  
258 high-radiant power LEDs located very close to the sample we hypothesized that this arrangement would  
259 still offer a workable illumination for most applications.

260 Because the color LEDs could not be placed on top of the sample, as it was already occupied by the white  
261 LED, the only positions left where the LEDs could be positioned was in the corners of the lid or at the  
262 cardinal points; we decided on the latter as it facilitated the mechanical design. We investigated how  
263 uniform was the illumination by illuminating fluorescent solutions (Hoechst, FITC, and Rhodamine) at  
264 angles of 0°, 22° and 45° with a 1 s exposure times and employing the plastic filters. (We fabricated three  
265 different lids to perform this experiment). **Fig 4** shows the heatmaps of the images captured by the CMOS  
266 color sensor at these different angles and considering only the digital channel closer to the emitted light.  
267 Data from the contribution of the rest of the RGB components can be found in **S5-S7 Fig**. As it can be

268 observed, vignetting is appreciable in most cases, but it is more manifest at an angle  $0^\circ$ . However, as the  
269 angle increases to  $22^\circ$  this vignetting is reduced and almost eliminated for the red (R) channel and to a  
270 lesser degree in the green (G) channel, but it is still significant for the blue channel (B): a reduced  
271 illumination is noticed on the left side of the heatmap, opposite to where the UV LED was placed.  
272 Increasing the angle to  $45^\circ$  reduces this vignetting for the B channel compared to the other angles; however,  
273 for the R channel the left side is less illuminated than the right side while the G channel shows a higher  
274 radial darkening than at  $22^\circ$ . Emission detection in the other channels is highly attenuated but not  
275 completely blocked; this can be attributed to the poor optical quality of the plastic filters. Others [16] have  
276 reported that employing the color filter array (CFA) of the CMOS sensor is sufficient to block the excitation  
277 light; we did not find this possible perhaps because of the quality of our sensor CFA. However, it is  
278 important to highlight that to improve image quality, color and dichroic glass filters can be fitted in our  
279 microscope. In general, the most suitable arrangement in our microscope to get the most even illumination  
280 is for the UV LED to be located at an angle of  $45^\circ$  and for both the red and blue LEDs placed at an angle  
281 of  $22^\circ$ . Note that this characterization would have to be performed if different LEDs are used as they come  
282 with different lenses and sizes. In summary, a simple illumination configuration, in which the LEDs are  
283 placed in close proximity to the sample, can provide an illumination comparable to critical illumination  
284 [25].

285

286 **Fig 4. Effects of the angle position of the LEDs on the illumination uniformity using direct**  
287 **illumination.** Each row corresponds to a different LED; the angle and the digital color channel analyzed  
288 are indicated on the top right corner. R: Red, G: Green, B: Blue. Fluorescence intensity has been normalized  
289 to a maximum value of 1.

290

291

## 292 **Fluorescence images**

293 To demonstrate the utility of our microscope to image single mammalian cells, we acquired bright field  
294 and fluorescence images using plastic filters (<\$1) and optical glass filters (>\$100). **Fig 5a** shows  
295 micrographs of THP-1 cells stained with EthD-1 (ex/em 528/617 nm), Calcein-AM (ex/em 496/516 nm)  
296 and DAPI (ex/em 360/460 nm) using plastic filters. The intensity profile across the diameter of two cells  
297 for the three-fluorescence channels is plotted in **Fig 5b**, after subtracting background intensity. As can be  
298 observed, plastic filters block fluorescence bleed-through from neighboring channels. Also, there is no  
299 significant difference with commercial glass filters, **S8 Fig**. This experiment demonstrated that our  
300 fluorescence microscope produces sufficient image quality to detect and analyze single cells.

301

302 **Fig 5. Fluorescence and brightfield micrographs of cells captured with our microscope.** (a) Brightfield  
303 and fluorescence micrographs of THP-1 monocytes stained with three different fluorescent dyes. (b)  
304 Graphs show the fluorescence intensity profile across two cells in all channels; color represents the  
305 fluorescence contribution from each channel. From top to bottom, red, green and blue fluorescence channel.  
306 Scale bar = 15  $\mu$ m.

307

## 308 **Single-cell assay**

309 To demonstrate the utility of our microscope in quantitative biological experiments, we performed a  
310 fluorescence time-lapse experiment to track the production of neutrophil extracellular traps (NETs) from  
311 single cells [26]. The nuclei of neutrophils isolated from peripheral blood were first stained with Hoechst,  
312 and then captured in a PDMS device containing an array of microwells (20  $\mu$ m in diameter). Next, cells  
313 were incubated with both LPS (to stimulate the production of NETs) and with Sytox Orange (a DNA stain  
314 impermeant stain).

315 Brightfield and fluorescence images (UV and Red) were acquired every 10 min for 2 h with our  
316 microscope (shown in **Fig 6a**) and with a high-end inverted fluorescence microscope for comparison (not  
317 shown). As it can be appreciated it is possible to distinguish single cells trapped in each well. Analysis of  
318 individual wells captured with our microscope are shown in **Fig 6b**, each gray trace corresponds to the  
319 fluorescence intensity of one individual well while the thick colored curves indicates the average of ~170  
320 wells. The results for Sytox Orange with both microscopes have similar trends: in both cases most of the  
321 wells showed a gradual increase in fluorescence intensity after ~15 min, reaching a peak at ~50 min (an  
322 indication of loss of plasma membrane integrity and thus yielding an indirect measurement of NET  
323 formation), and slowly decreasing as the DNA diffused out of the wells. In the case of Hoechst, the results  
324 of our microscope compare favorably to the Zeiss microscope, with both data showing a slight fluorescence  
325 intensity from the beginning of the assay—as all the cells nuclei were stained—, increasing gradually to a  
326 maximum intensity at 50 min, to eventually decrease afterwards. A negative control experiment where cells  
327 were incubated with Hank's solution did not show any change in fluorescence intensity over time, **S9 Fig**.  
328 The slight difference in the data obtained with the Zeiss microscope—higher peaks and smother curves—  
329 was expected given the quality of its optical filters and its sophisticated illumination, while ours had a  
330 higher background noise. Overall, it is possible to perform quantitative biological experiments in our  
331 microscope, enabling fluorescence time-lapse microscopy.

332

333 **Fig 6. Single cell assays in microwells.** (a) Representative images of the neutrophil assay at different time  
334 points acquired with our microscope using plastic filters. Arrows point to single cells trapped in the  
335 microwells. Scale bar: 20  $\mu\text{m}$ . (b) Traces of fluorescence intensities from single wells acquired with the  
336 miniature microscope (red) and a Zeiss microscope (blue). Thick lines represent the average of ~170  
337 microwells.

338

339

## 340 **Cell tracking**

341 Another feature of our miniature microscope is the capability to record video in brightfield and fluorescence  
342 mode. Using a single-channel microfluidic device with a width of 40  $\mu\text{m}$  and a height of 20  $\mu\text{m}$ , we injected  
343 THP-1 cells stained with Calcein-AM at a speed of  $\sim 150 \mu\text{m/s}$ , and recorded a video while traveling through  
344 the channel (**Figs 7a and 7b**). **Fig 7c** shows a brightfield micrograph of a single cell flowing in the  
345 microfluidic channel while **Fig 7d** shows fluorescence micrographs of two cells acquired with a 100 ms  
346 exposure time. **S3 Video** shows the facility to focus the optics onto the microfluidic channel and to start  
347 recording the cells flowing through the channel, demonstrating the capabilities of our fluorescence  
348 microscopy system to not only capture still images of objects sitting on a microscope slide.

349

350 **Fig 7. Tracking cells in a microfluidic channel.** (a) Schematic of the microfluidic device in which cells  
351 stained with a fluorescent dye are flowed in a microfluidic device. (b) Photograph of the single-channel  
352 microfluidic device. (c) Brightfield image of a single THP-1 cell flowing at a speed of  $\sim 150 \mu\text{m/s}$  in a 40-  
353  $\mu\text{m}$  wide channel. (d) Fluorescence micrographs of two cells flowing inside channel with a 100 ms  
354 exposure time. White arrows point to cells.

355

## 356 **Time-lapse microscopy in a cell culture chamber**

357 Because of its size, one of the key features of our microscope is its portability which enables to be used  
358 in different settings. To demonstrate this, we used the microscope inside a cell culture incubator set at  $37^\circ\text{C}$   
359 with 5%  $\text{CO}_2$  and monitored the culture of THP-1 cells over 26 hours. **S10 Fig** shows a photograph of the  
360 miniature microscope placed inside the incubator and the PDMS chamber used for this experiment.

361 **Fig 8a** shows a series of brightfield micrographs captured every 15 min where it can be appreciated how  
362 cells migrate. These images clearly show that cell proliferation is carried out without any disturbance inside



363 the miniature microscope which probes its mechanical robustness. During the time lapse imaging, cells  
364 move around the field of view individually or even collectively, staying attached for a few hours after cell  
365 division. A sequence of micrographs captured every minute of cells undergoing cell division is shown in  
366 **Fig 8b** and **S4 Video**. It is evident that our microscope has enough resolution to observe the lamellipodia  
367 of cells extending and retracting, cells migrating over time, and also to distinguish cells undergoing  
368 division.

369

370

371 **Fig 8. Time-lapse imaging of THP-1 cells.** (a) Sequence of brightfield micrographs of a cell culture assay  
372 that lasted 23 h; images were captured every 15 min. (b) Close-up to a sequence of images captured every  
373 minute showing the exact moment a cell is dividing (arrows).

374

## 375 **Conclusions**

376 Fluorescence microscopy is an important instrument in biomedical research. Here, we have demonstrated  
377 that using 3D printed parts and basic electronic components it is possible to build a miniature 3-channel  
378 fluorescence microscope for under \$100. In our design, we favored simplicity over other metrics so that it  
379 could be assembled rapidly (10 min), although still able to produce sufficient image quality to analyze  
380 single cells. We demonstrated that placing color LEDs at different angles from the sample produces a  
381 homogenous illumination. We also showed that plastic filters minimized fluorescence bleed-through to  
382 the same level of optical glass filters. To demonstrate its application in single cell assays, we monitored  
383 the production of NETs from single neutrophils, yielding similar data to a commercial microscope. Our  
384 microscope is ideal for downstream applications using microfluidic devices, as demonstrated here, or in  
385 situations where space is a premium, for example inside a CO<sub>2</sub> incubator but we also foresee applications

386 in diagnostics or telemedicine. Because of its low-cost and size, several microscopes could be assembled  
387 to monitor several assays at once.

388 Since LEDs have long-life spans (20,000-50,000 hours) our microscope is suitable for long-term  
389 experimentation which could enable acquisition of large amounts of data and translate into better  
390 characterization of biological systems. One of the limitations of our microscope are its narrow field of view  
391 and its fixed magnification. Thus, an area of opportunity is to develop a motorized stage or use larger CMOS  
392 image sensors. Despite this, our microscope performed a fluorescence time-lapse experiment of single cells  
393 yielding similar data to a conventional microscope.

394

## 395 **Supporting Information**

396 Electronic Supplementary Information (ESI) available: Detailed fabrication on the microscope parts.  
397 Photographs of the step by step assembly of the microscope. Designs of the electronic circuits (PDF).  
398 Movies of the microscope assembly and the usage during an experiment showcasing the graphical user  
399 interface (MOV).

## 400 **Acknowledgments**

401 We would like to thank all the members of the Bio-ARTS Lab at Cinvestav-Monterrey for helpful  
402 discussions.

403

## 404 **References**

- 405 1. Agard DA, Hiraoka Y, Shaw P, Sedat JW. Fluorescence Microscopy in Three Dimensions.  
406 Methods in Cell Biology. 1989. pp. 353–377. doi:10.1016/S0091-679X(08)60986-3
- 407 2. Wessels JT, Pliquet U, Wouters FS. Light-emitting diodes in modern microscopy-from David to

- 408 Goliath? *Cytom Part A*. 2012;81 A: 188–197. doi:10.1002/cyto.a.22023
- 409 3. Breslauer DN, Maamari RN, Switz NA, Lam WA, Fletcher DA. Mobile phone based clinical  
410 microscopy for global health applications. *PLoS One*. 2009;4: e6320.  
411 doi:10.1371/journal.pone.0006320
- 412 4. Miller AR, Davis GL, Oden ZM, Razavi MR, Fateh A, Ghazanfari M, et al. Portable, battery-  
413 operated, low-cost, bright field and fluorescence microscope. *PLoS One*. 2010;5: 8–10.  
414 doi:10.1371/journal.pone.0011890
- 415 5. Schaefer S, Boehm SA, Chau KJ. Automated, portable, low-cost bright-field and fluorescence  
416 microscope with autofocus and autoscanning capabilities. *Appl Opt*. 2012;51: 2581–2588.  
417 doi:10.1364/AO.51.002581
- 418 6. Jin D, Wong D, Li J, Luo Z, Guo Y, Liu B, et al. Compact Wireless Microscope for In-Situ Time  
419 Course Study of Large Scale Cell Dynamics within an Incubator. *Sci Rep*. Nature Publishing  
420 Group; 2015;5: 18483. doi:10.1038/srep18483
- 421 7. Coloma J, Harris E. Innovative low cost technologies for biomedical research and diagnosis in  
422 developing countries. *BMJ*. 2004;329: 1160–2. doi:10.1136/bmj.329.7475.1160
- 423 8. Sulkin MS, Widder E, Shao C, Holzem KM, Gloschat C, Gutbrod SR, et al. Three-dimensional  
424 printing physiology laboratory technology. *Am J Physiol Heart Circ Physiol*. 2013;305: H1569-73.  
425 doi:10.1152/ajpheart.00599.2013
- 426 9. Bishop GW, Satterwhite-Warden JE, Kadimisetty K, Rusling JF. 3D-printed bioanalytical devices.  
427 *Nanotechnology*. IOP Publishing; 2016;27. doi:10.1088/0957-4484/27/28/284002
- 428 10. Symes MD, Kitson PJ, Yan J, Richmond CJ, Cooper GJT, Bowman RW, et al. Integrated 3D-  
429 printed reactionware for chemical synthesis and analysis. *Nat Chem*. Nature Publishing Group;  
430 2012;4: 349–354. doi:10.1038/nchem.1313

- 431 11. Hernández Vera R, Schwan E, Fatsis-Kavalopoulos N, Kreuger J, Gross B, Erkal J, et al. A  
432 Modular and Affordable Time-Lapse Imaging and Incubation System Based on 3D-Printed Parts,  
433 a Smartphone, and Off-The-Shelf Electronics. *PLoS One*. 2016;11: e0167583.  
434 doi:10.1371/journal.pone.0167583
- 435 12. Wei Q, Qi H, Luo W, Tseng D, Ki SJ, Wan Z, et al. Fluorescent imaging of single nanoparticles  
436 and viruses on a smart phone. *ACS Nano*. 2013;7: 9147–9155. doi:10.1021/nn4037706
- 437 13. Zhu H, Yaglidere O, Su T-W, Tseng D, Ozcan A. Cost-effective and compact wide-field  
438 fluorescent imaging on a cell-phone. *Lab Chip*. 2011;11: 315–322. doi:10.1039/C0LC00358A
- 439 14. Cressey D. The DIY electronics transforming research. *Nature*. 2017;544: 125–126.  
440 doi:10.1038/544125a
- 441 15. Wang Z, Boddeda A, Parker B, Samanipour R, Ghosh S, Menard F, et al. A high-resolution mini-  
442 microscope system for wireless real-time monitoring. *IEEE Trans Biomed Eng*. 2017;  
443 doi:10.1109/TBME.2017.2749040
- 444 16. Zhang YS, Ribas J, Nadhman A, Aleman J, Selimović Š, Leshner-Perez SC, et al. A cost-effective  
445 fluorescence mini-microscope for biomedical applications. *Lab Chip*. 2015;15: 3661–3669.  
446 doi:10.1039/C5LC00666J
- 447 17. Maia Chagas A, Prieto-Godino LL, Arrenberg AB, Baden T. The €100 lab: A 3D-printable open-  
448 source platform for fluorescence microscopy, optogenetics, and accurate temperature control  
449 during behaviour of zebrafish, *Drosophila*, and *Caenorhabditis elegans*. *PLoS Biol*. 2017;15: 1–21.  
450 doi:10.1371/journal.pbio.2002702
- 451 18. Cybulski JS, Clements J, Prakash M. Foldscope: Origami-based paper microscope. *PLoS One*.  
452 2014;9. doi:10.1371/journal.pone.0098781
- 453 19. Gonzalez-Suarez AM, Pena-Del Castillo JG, Hernández-Cruz A, Garcia-Cordero JL. Dynamic  
454 Generation of Concentration- and Temporal-Dependent Chemical Signals in an Integrated

- 455 Microfluidic Device for Single-Cell Analysis. *Anal Chem.* 2018;90: 8331–8336.  
456 doi:10.1021/acs.analchem.8b02442
- 457 20. Nuñez I, Matute T, Herrera R, Keymer J, Marzullo T, Rudge T, et al. Low cost and open source  
458 multi-fluorescence imaging system for teaching and research in biology and bioengineering. *PLoS*  
459 *One.* 2017;12: 1–21. doi:10.1371/journal.pone.0187163
- 460 21. Switz NA, D’Ambrosio M V., Fletcher DA. Low-cost mobile phone microscopy with a reversed  
461 mobile phone camera lens. *PLoS One.* 2014;9. doi:10.1371/journal.pone.0095330
- 462 22. Kim SB, Koo K, Bae H, Dokmeci MR, Hamilton G a, Bahinski A, et al. A mini-microscope for in  
463 situ monitoring of cells. *Lab Chip.* 2012;12: 3976–82. doi:10.1039/c2lc40345e
- 464 23. Peli E. Contrast in complex images. *J Opt Soc Am A.* 1990;7: 2032.  
465 doi:10.1364/JOSAA.7.002032
- 466 24. Taylor DL. Basic Fluorescence Microscopy. *Methods Cell Biol.* 1988;29: 207–237.  
467 doi:10.1016/S0091-679X(08)60196-X
- 468 25. Bosse JB, Tanneti NS, Hogue IB, Enquist LW. Open LED illuminator: A simple and inexpensive  
469 LED illuminator for fast multicolor particle tracking in neurons. *PLoS One.* 2015;10: 1–21.  
470 doi:10.1371/journal.pone.0143547
- 471 26. Jimenez-Valdes RJ, Rodriguez-Moncayo R, Cedillo-Alcantar DF, Garcia-Cordero JL. Massive  
472 Parallel Analysis of Single Cells in an Integrated Microfluidic Platform. *Anal Chem.* 2017;89:  
473 5210–5220. doi:10.1021/acs.analchem.6b04485

## 474 **Supporting information**

475 **S1 Table. Bill of materials of the components used to build the microscope.**

476

477 **S1 Video. Assembly of the microscope.**

478

479 **S2 Video. Operation of the microscope.**

480

481 **S3 Video. Tracking of cells flowing in a microfluidic channel.**

482

483 **S4 Video. Time lapse of THP-1 cells growing on a flat surface.**

484

485 **S1 Fig. Photograph of the 3D-printed pieces used to assemble the miniature microscope.**

486

487 **S2 Fig. Design of the microscope tube.** (Left) Front view of the mechanical tube of the microscope.

488 Thread pitch is 1 mm. (Right) Cross-sectional view of the mechanical tube, showing the lens attached to

489 the top of the tube. All dimensions are in mm.

490

491 **S3 Fig. Schematic and PCB layout of the electronic control unit.** (a) Circuit design. (b) Printed circuit

492 board layout.

493

494 **S4 Fig. Graphic User Interface (GUI) to control the microscope.** The GUI was coded in Python by

495 combining Tkinter, picamera and OpenCV libraries.

496

497 **S5 Fig. Analysis of the illumination uniformity at an angle of 0° for all the channels.** Each row

498 corresponds to a different LED; the angle and the digital color channel analyzed are indicated on the top

499 right corner. R: Red, G: Green, B: Blue. Fluorescence intensity has been normalized to a maximum value

500 of 1.

501

502 **S6 Fig. Analysis of the illumination uniformity at an angle of 22° for all the channels.** Each row

503 corresponds to a different LED; the angle and the digital color channel analyzed are indicated on the top

504 right corner. R: Red, G: Green, B: Blue. Fluorescence intensity has been normalized to a maximum value  
505 of 1

506

507 **S7 Fig. Analysis of the illumination uniformity at an angle of 45° for all the channels.** Each row  
508 corresponds to a different LED; the angle and the digital color channel analyzed are indicated on the top  
509 right corner. R: Red, G: Green, B: Blue. Fluorescence intensity has been normalized to a maximum value  
510 of 1

511

512 **S8 Fig. Comparison of images captured with both microscopes.** Brightfield and fluorescence  
513 micrographs captured with our microscope using plastic filters (left) or Zeiss filters (right). THP-1 cells  
514 stained with different fluorochromes: EthD-1 (red), Calcein-AM (green) and DAPI (blue). Images using  
515 all filters were acquired for each fluorochrome. Graphs show intensity profile of two cells across all  
516 channels, showing that there is no fluorescence bleed-through between channels.

517

518 **S9 Fig. Negative control experiments.** Traces of fluorescence intensities from single wells for the  
519 negative control experiment shown in Fig 6.

520

521 **S10 Fig. Assay inside a cell culture incubator.** (a) Photograph of the inside of a cell culture incubator  
522 showing the microscope and the microcomputer Raspberry. (b) Photograph of the cell culture chamber  
523 made of PDMS.

524

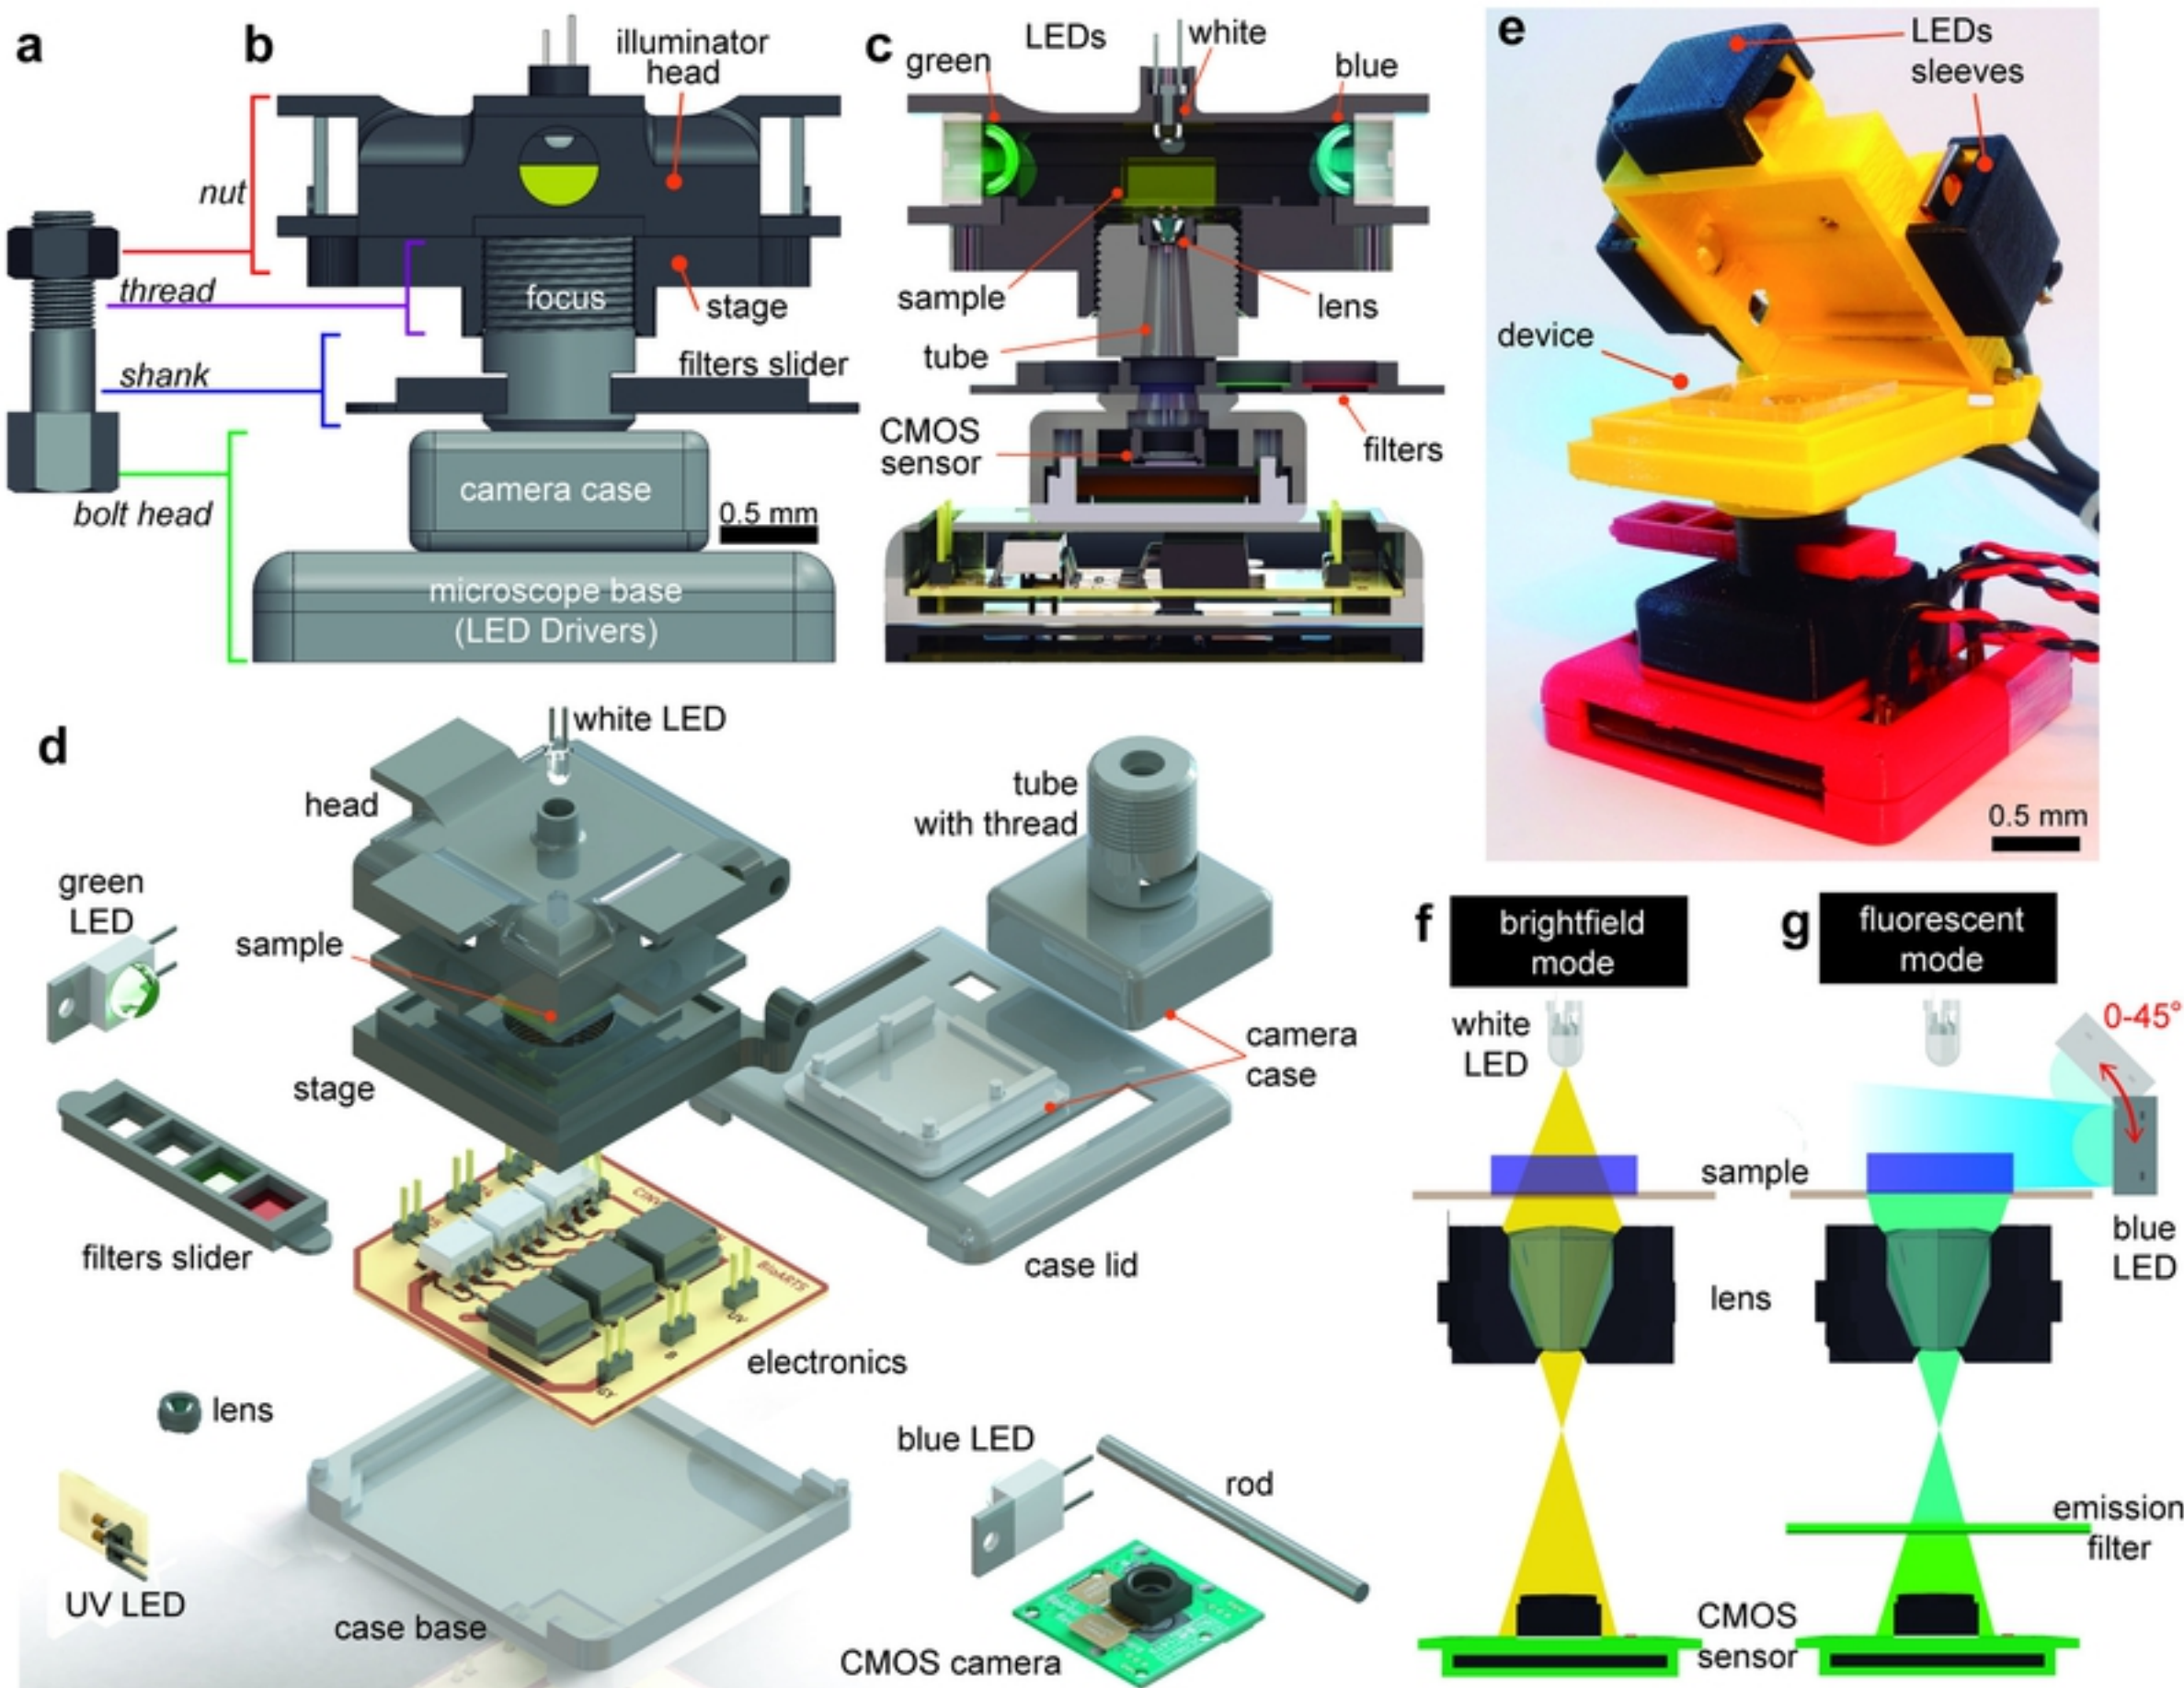

Figure 1



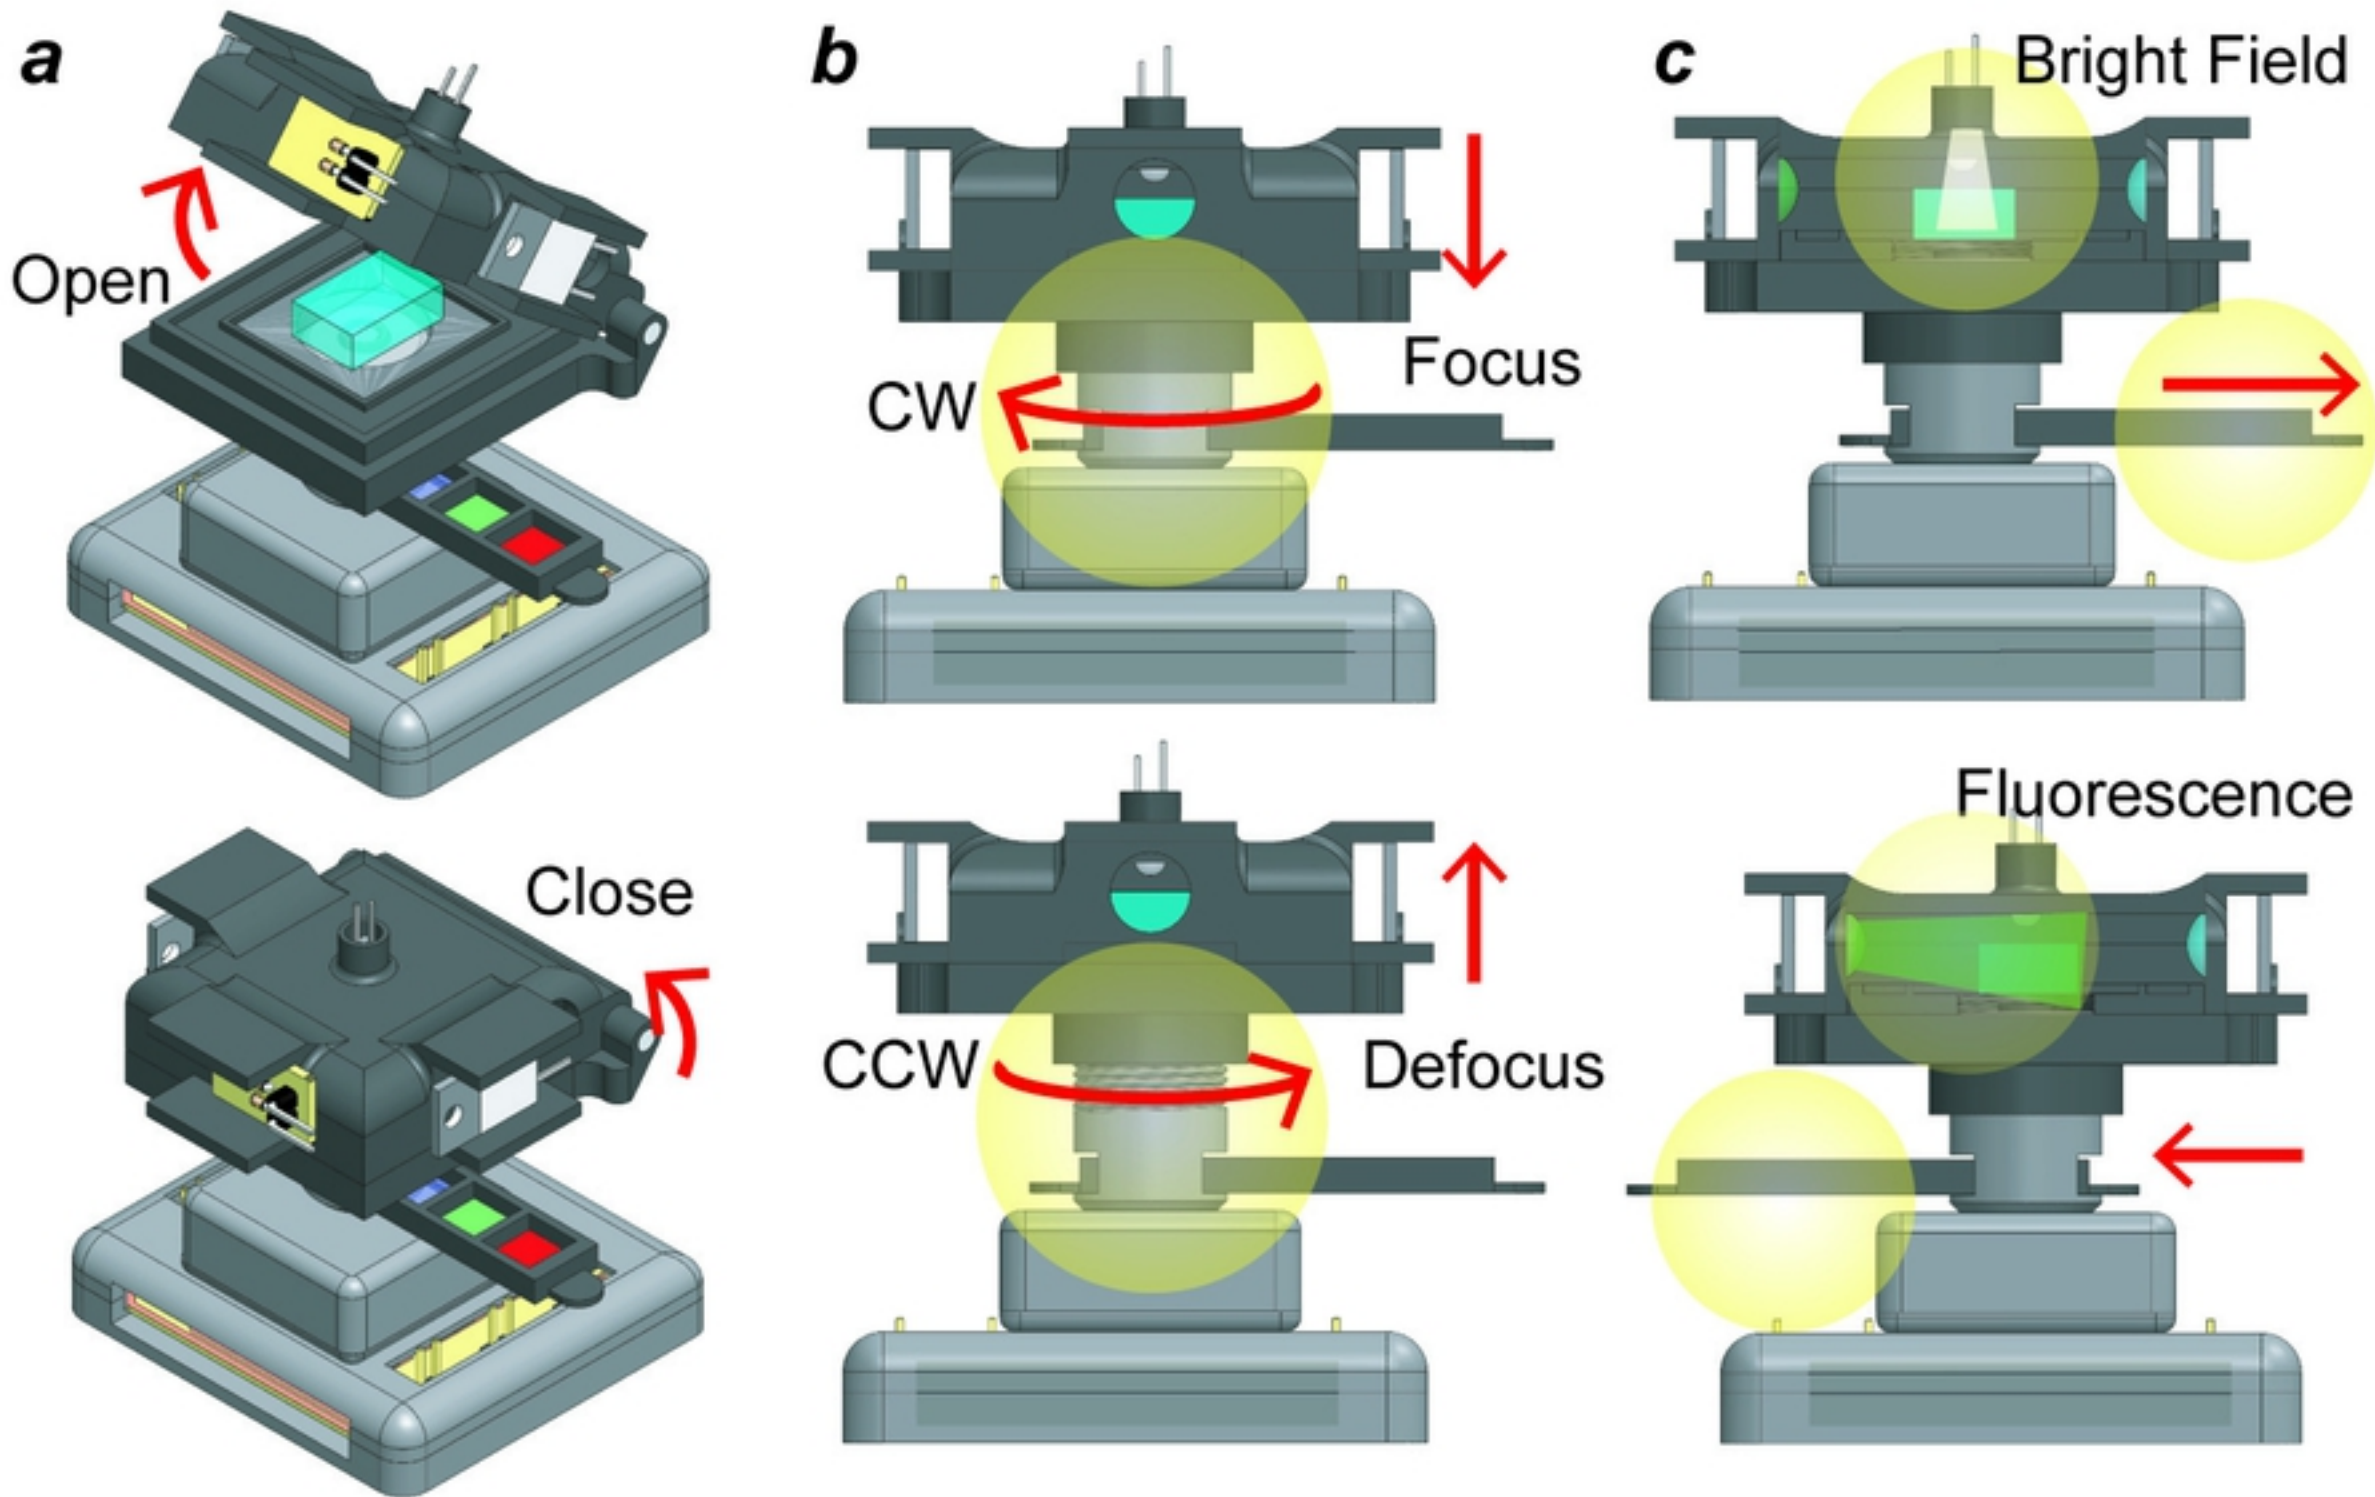

Figure 2

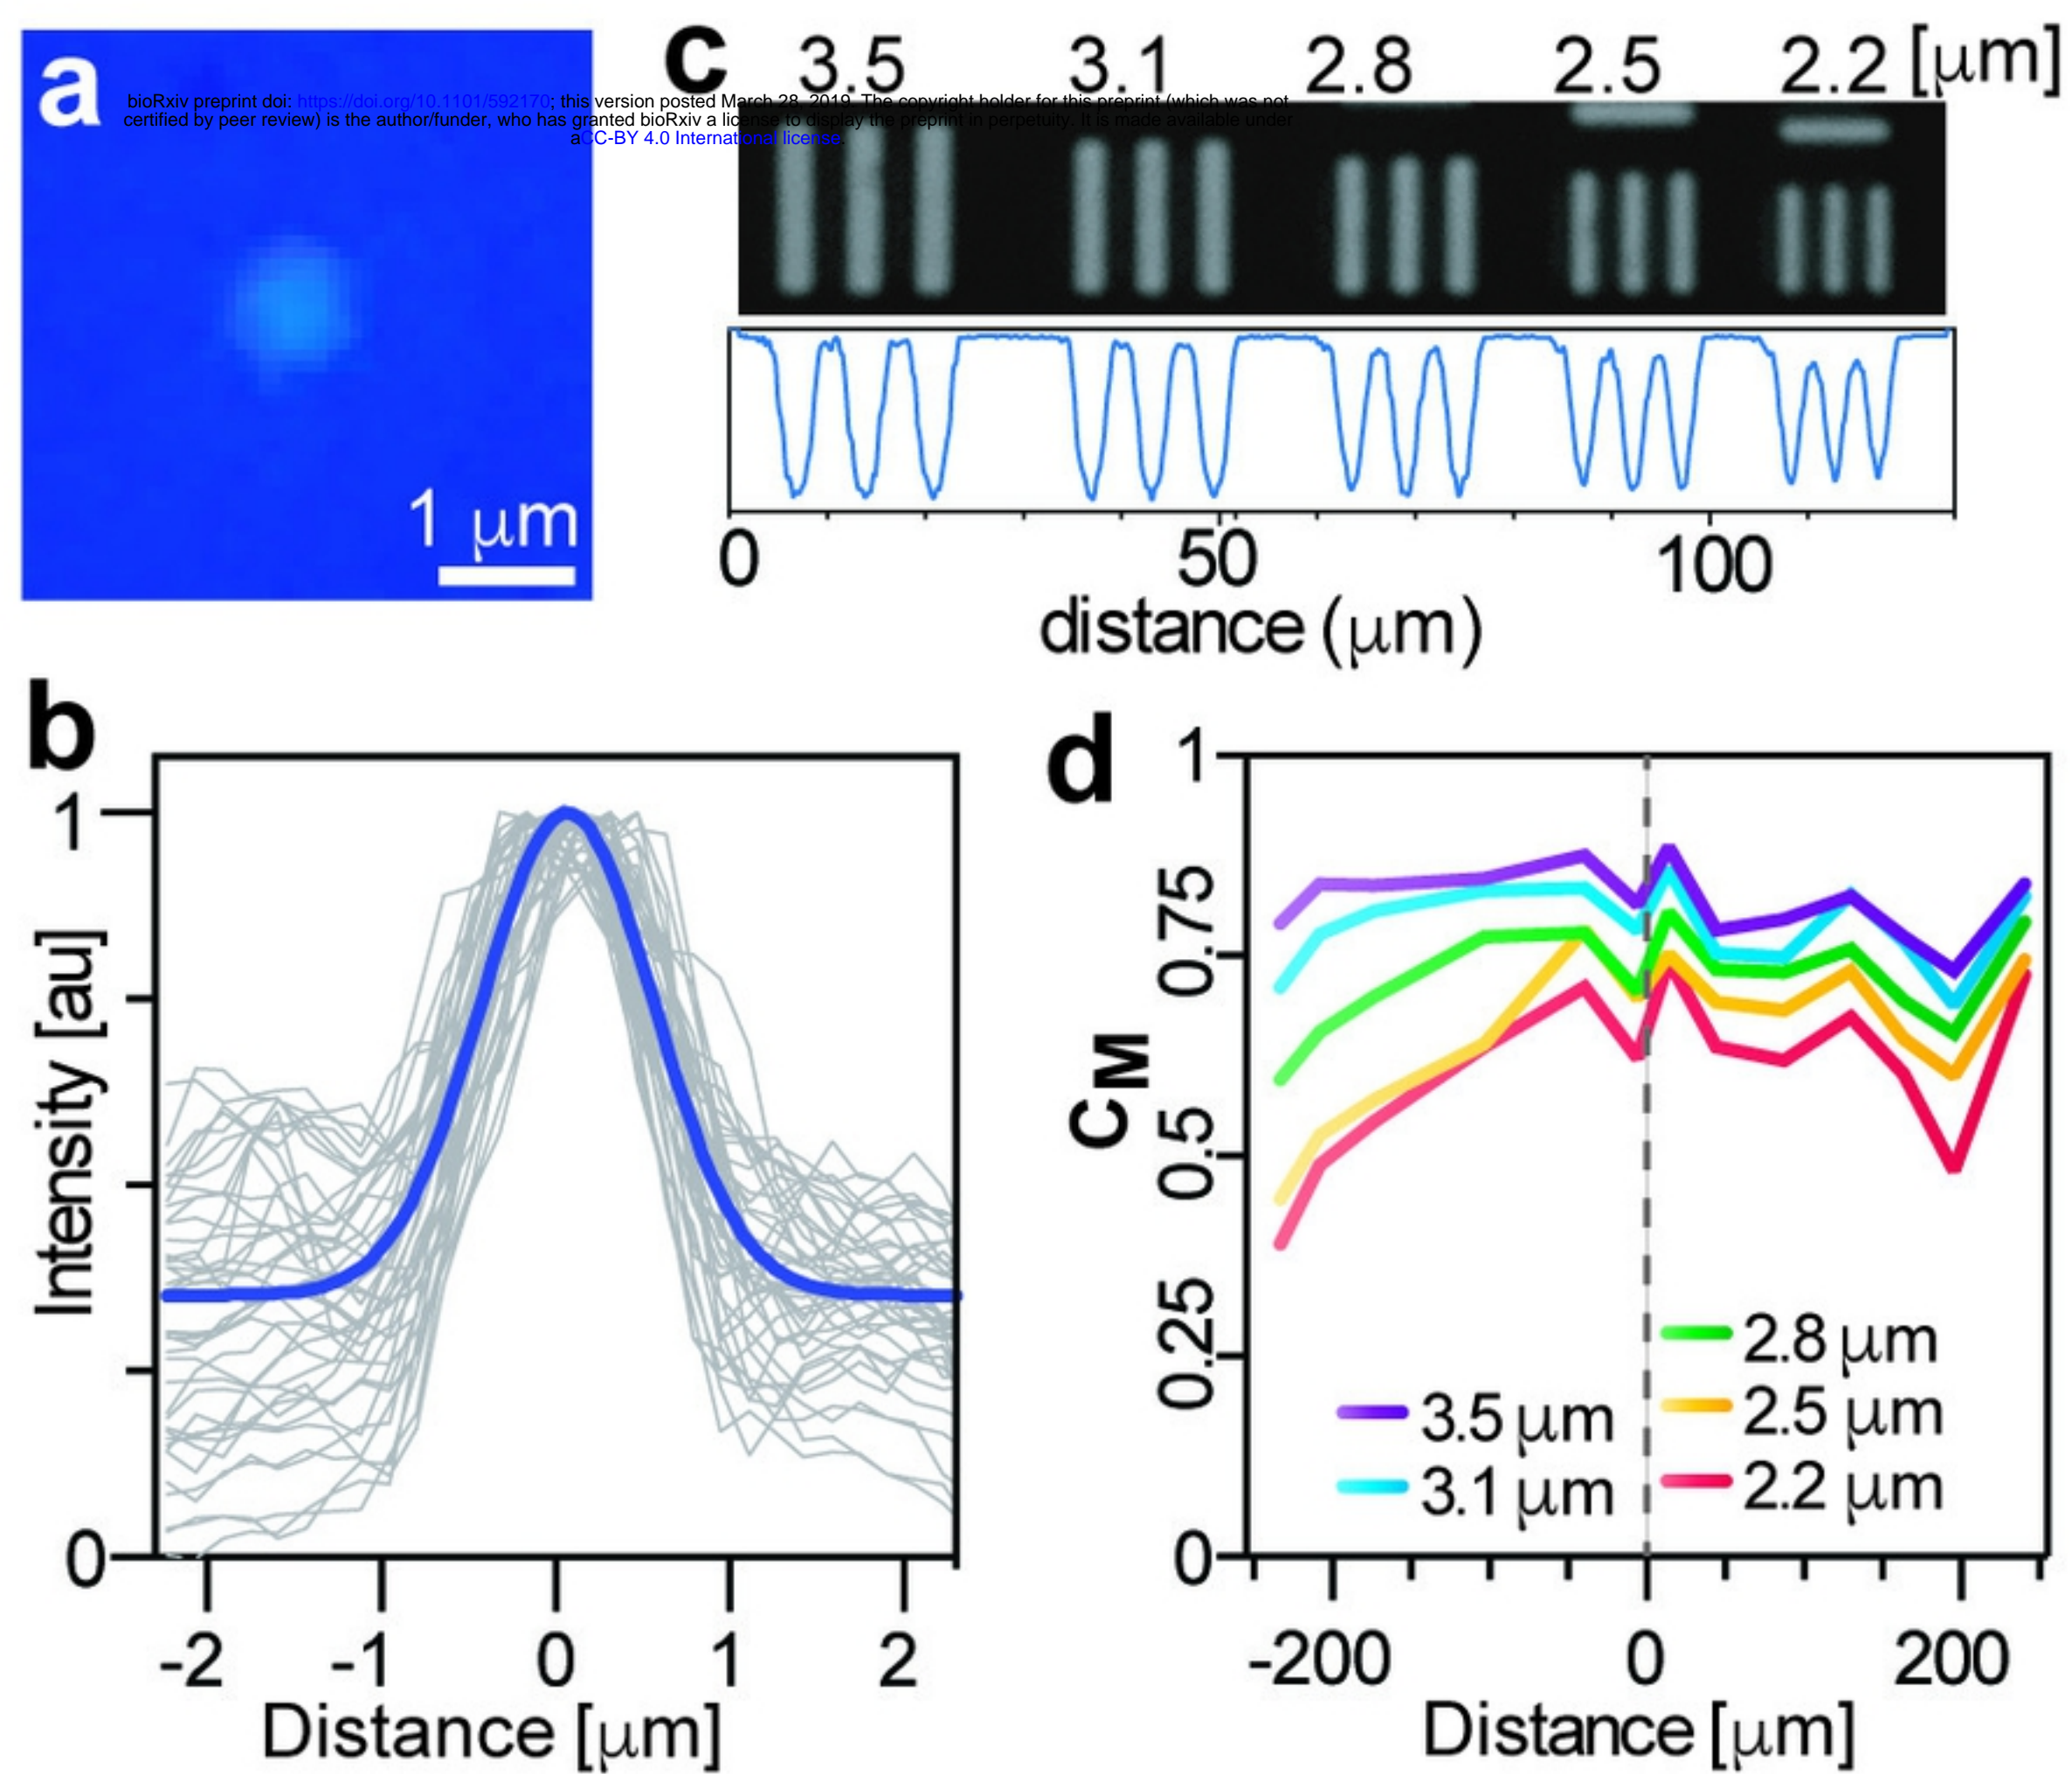

Figure 3

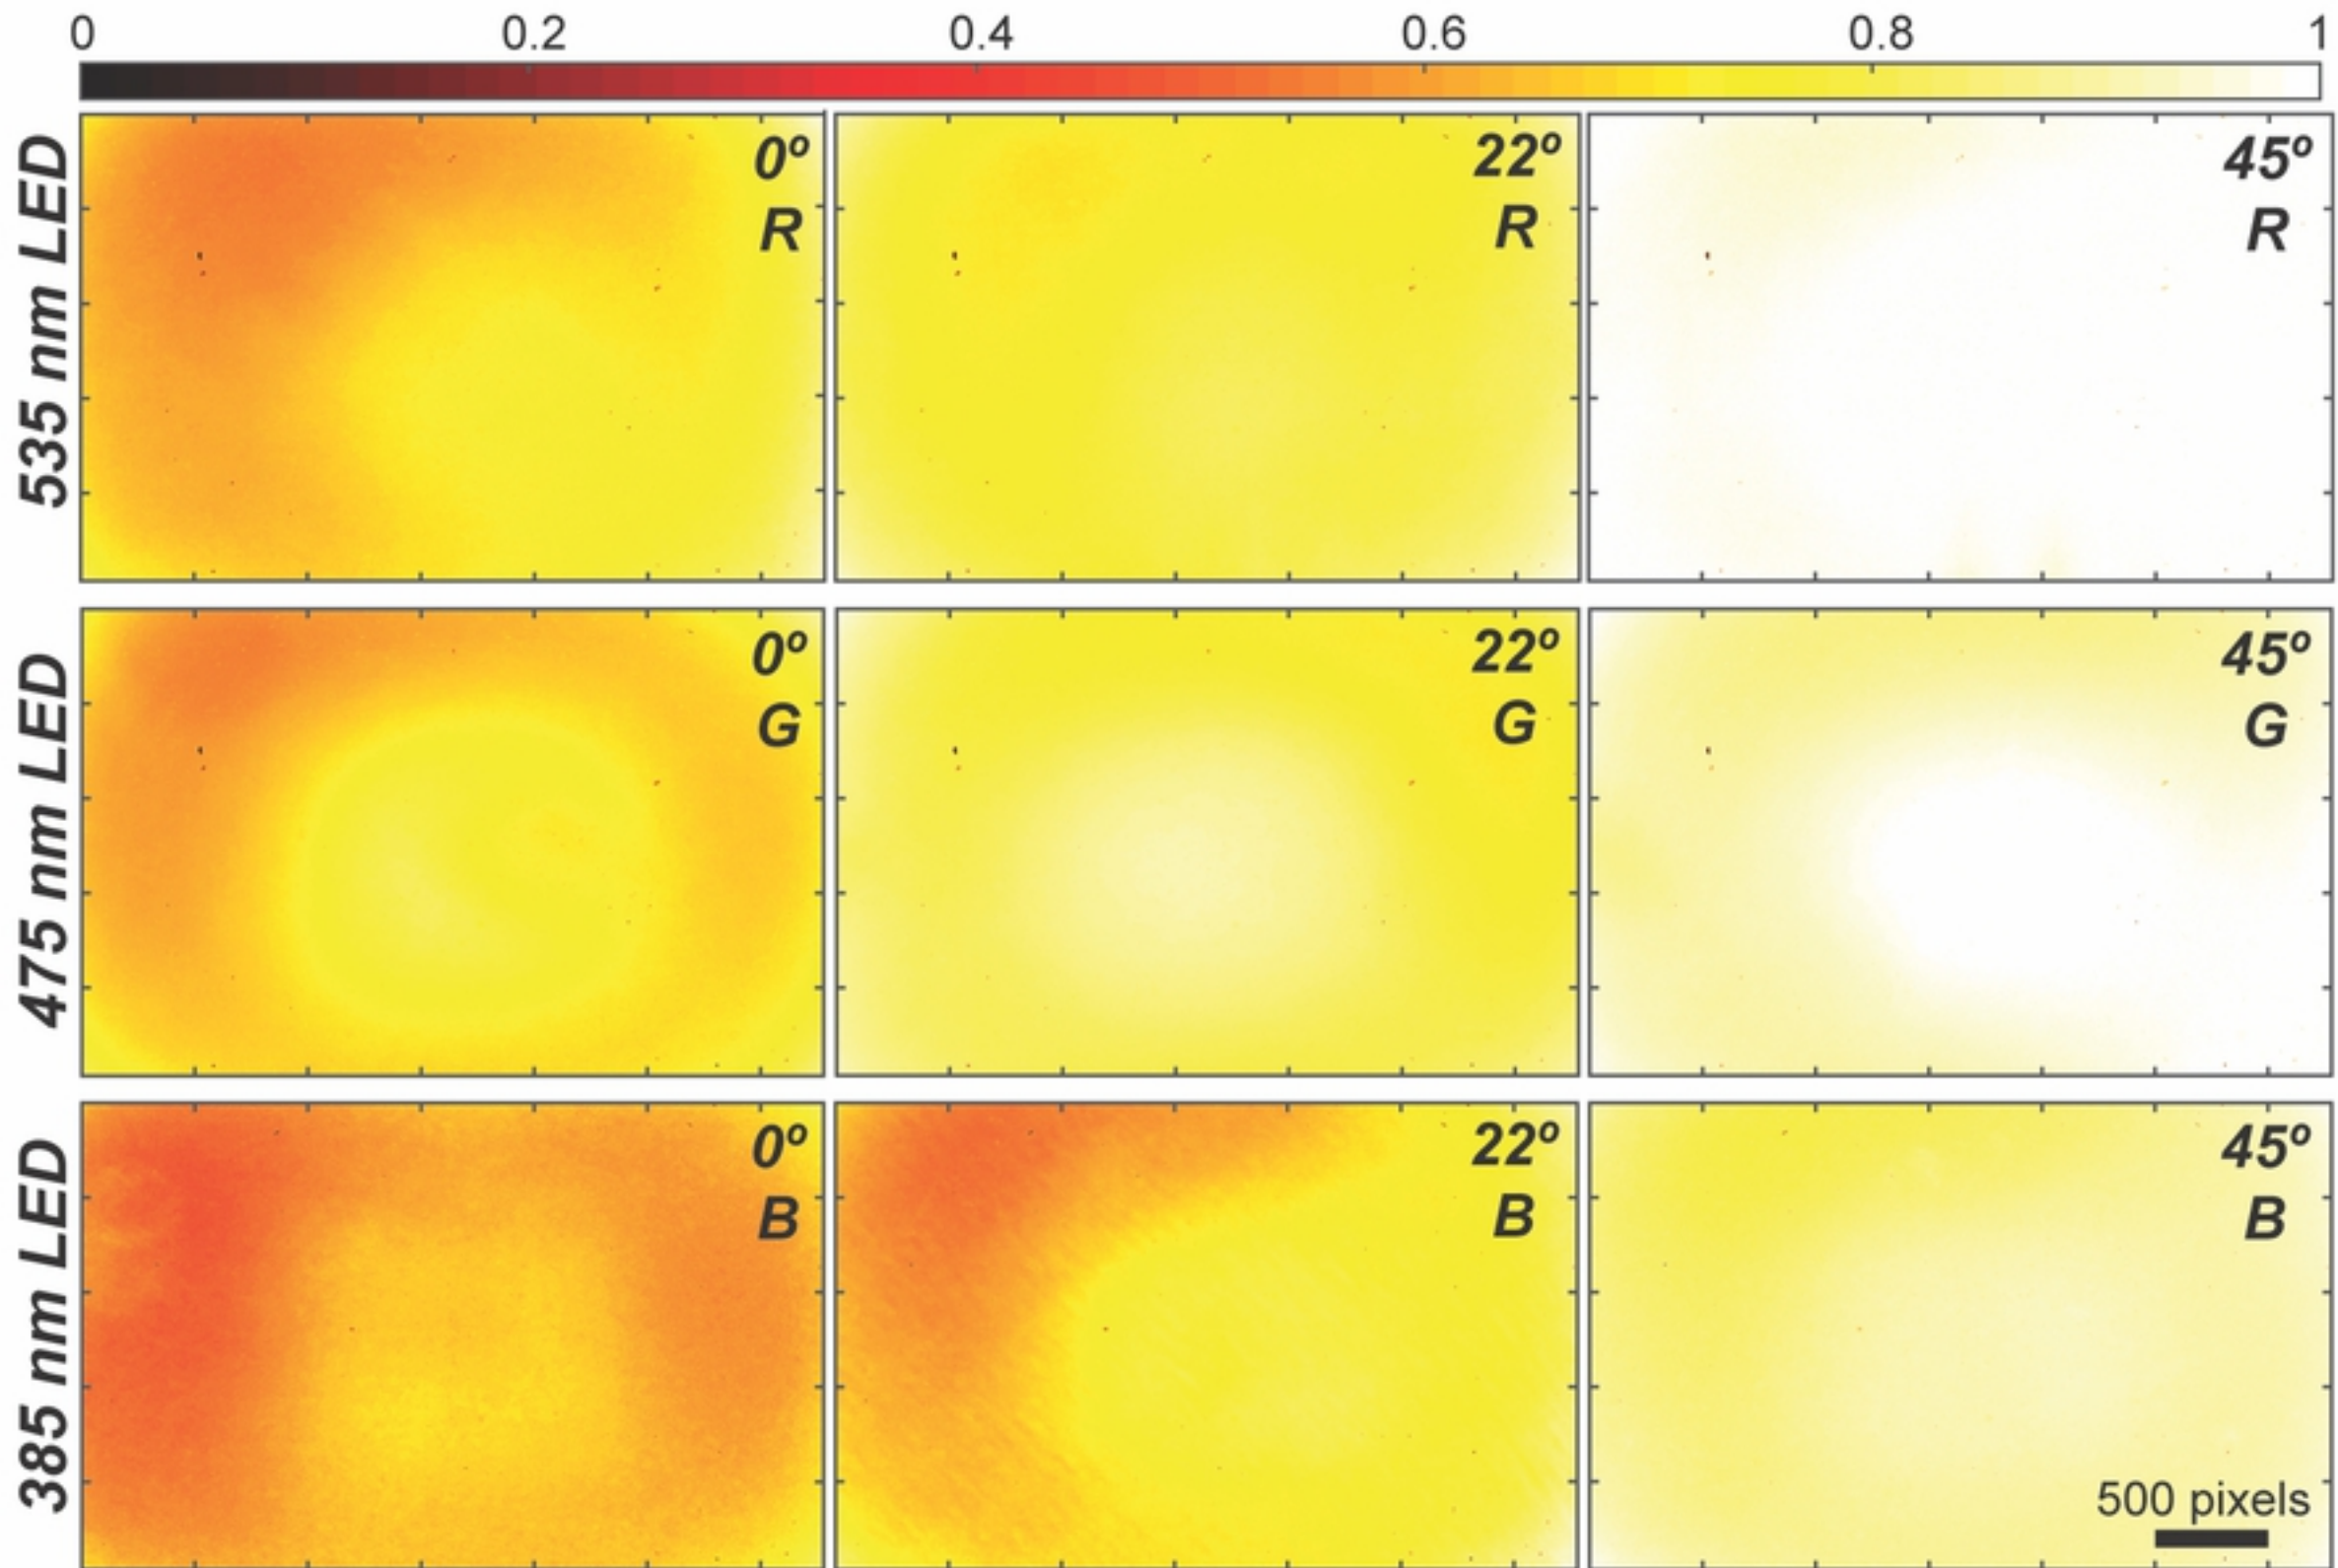

Figure 4



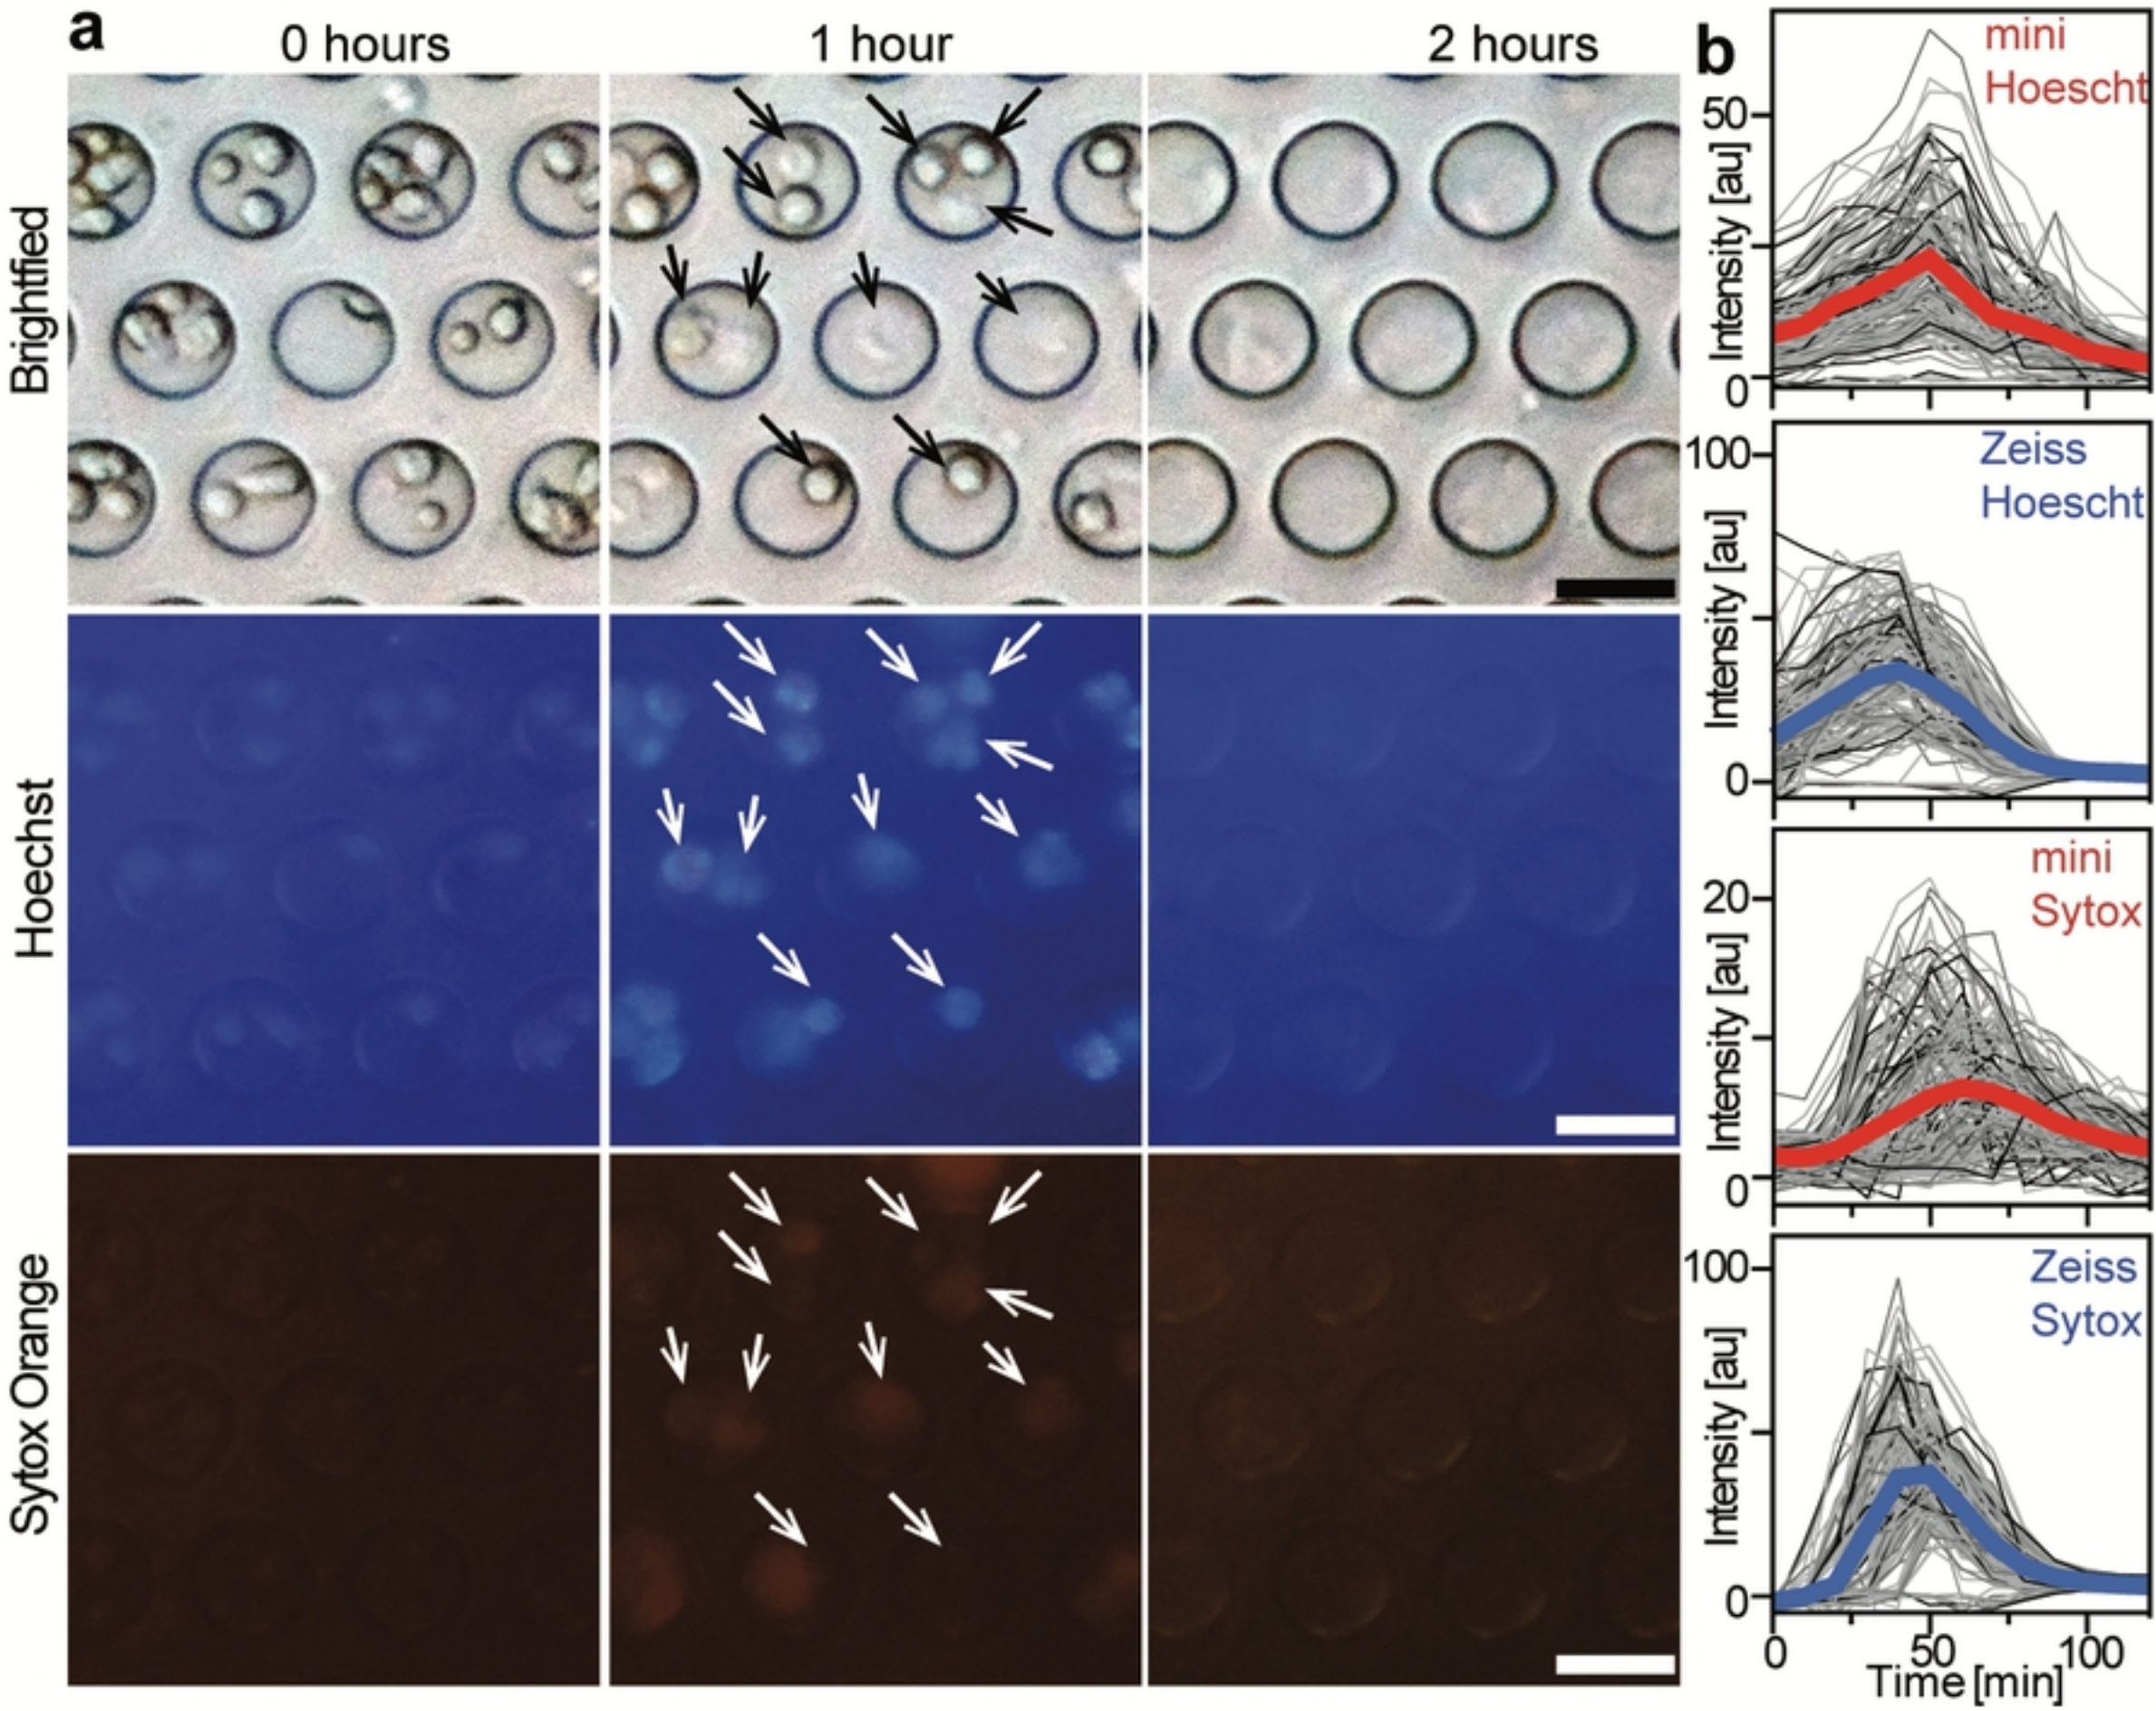

Figure 6

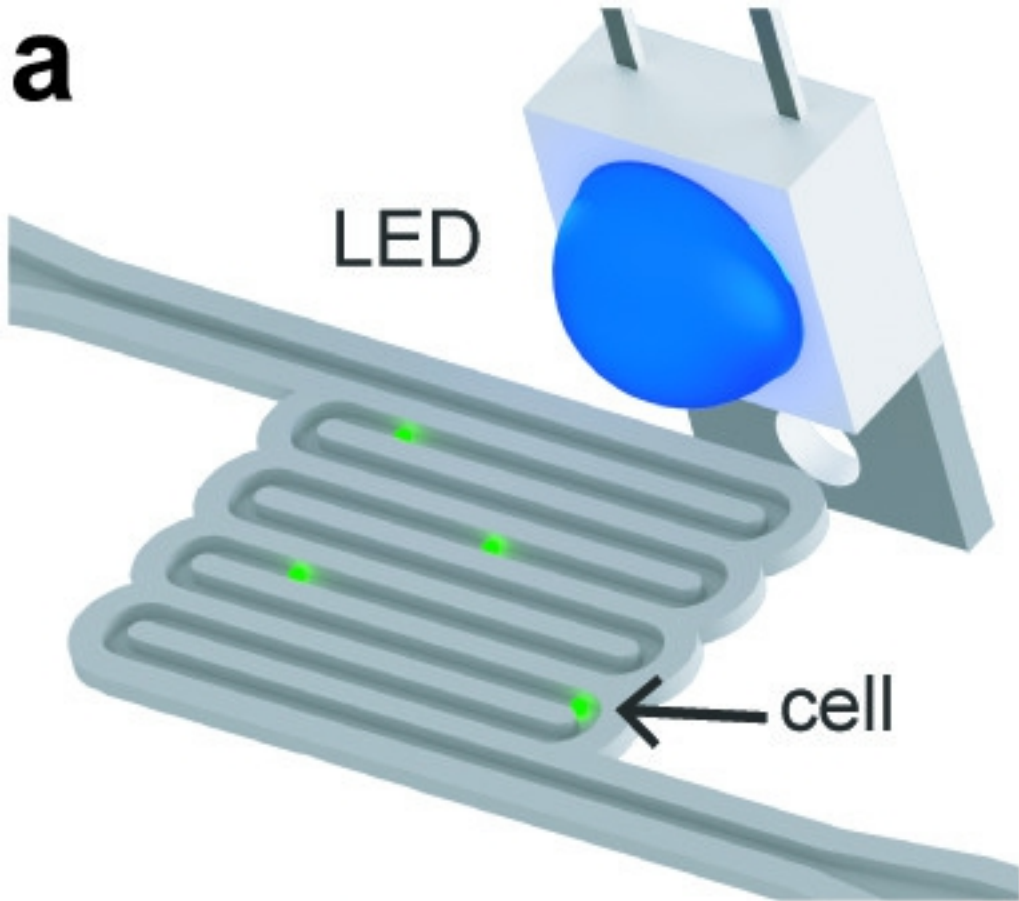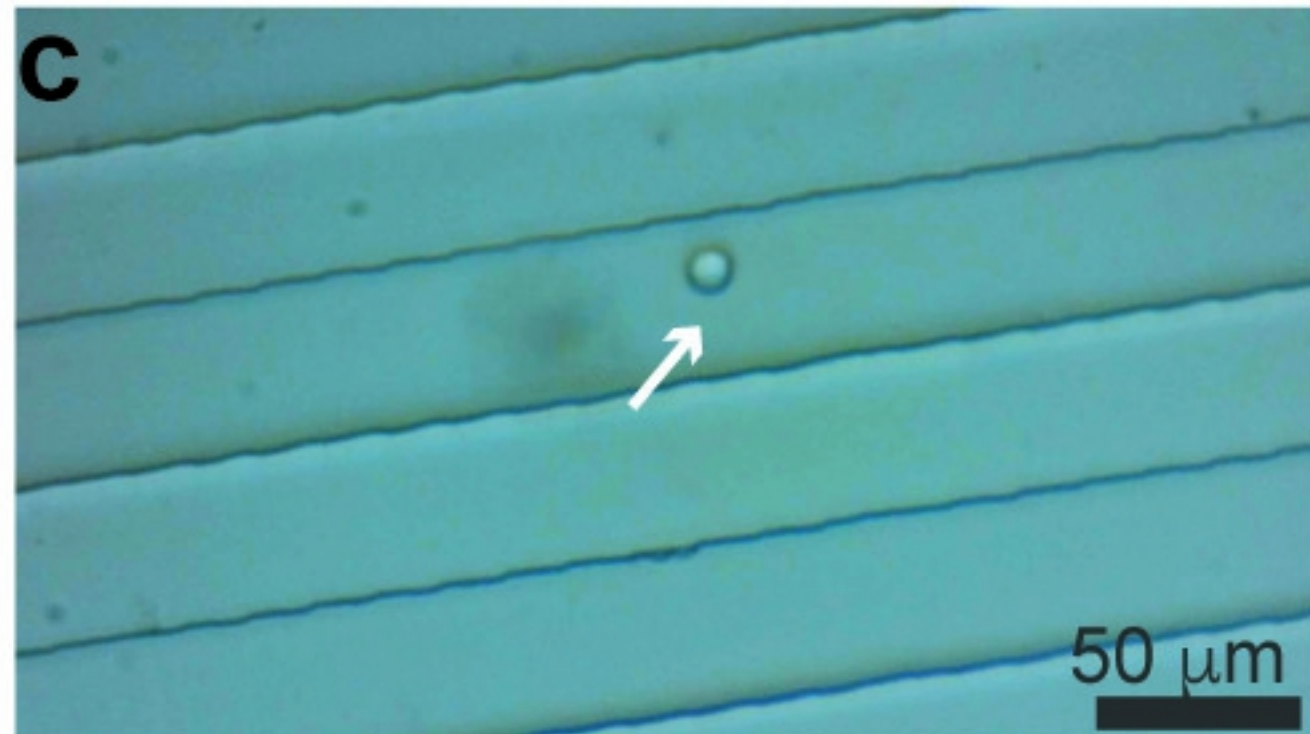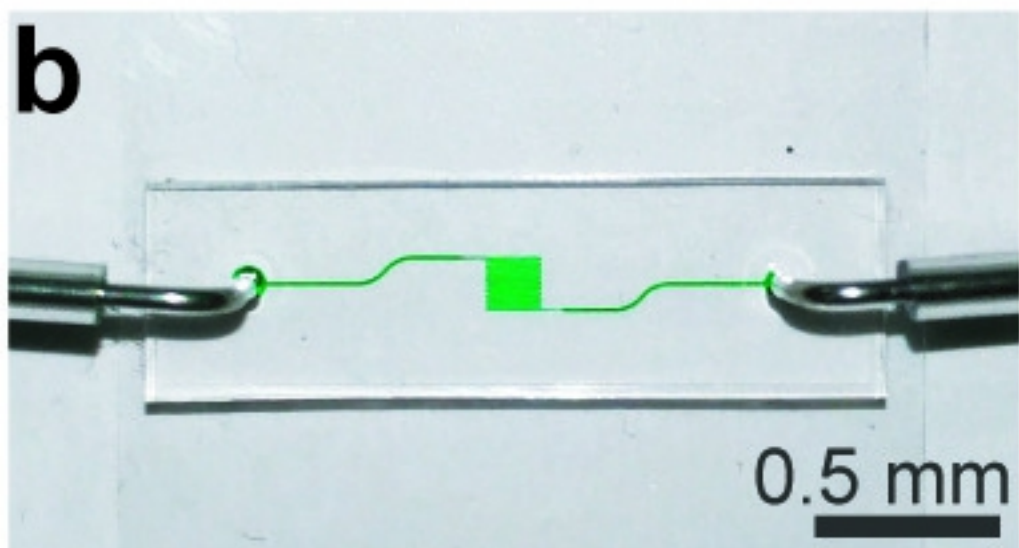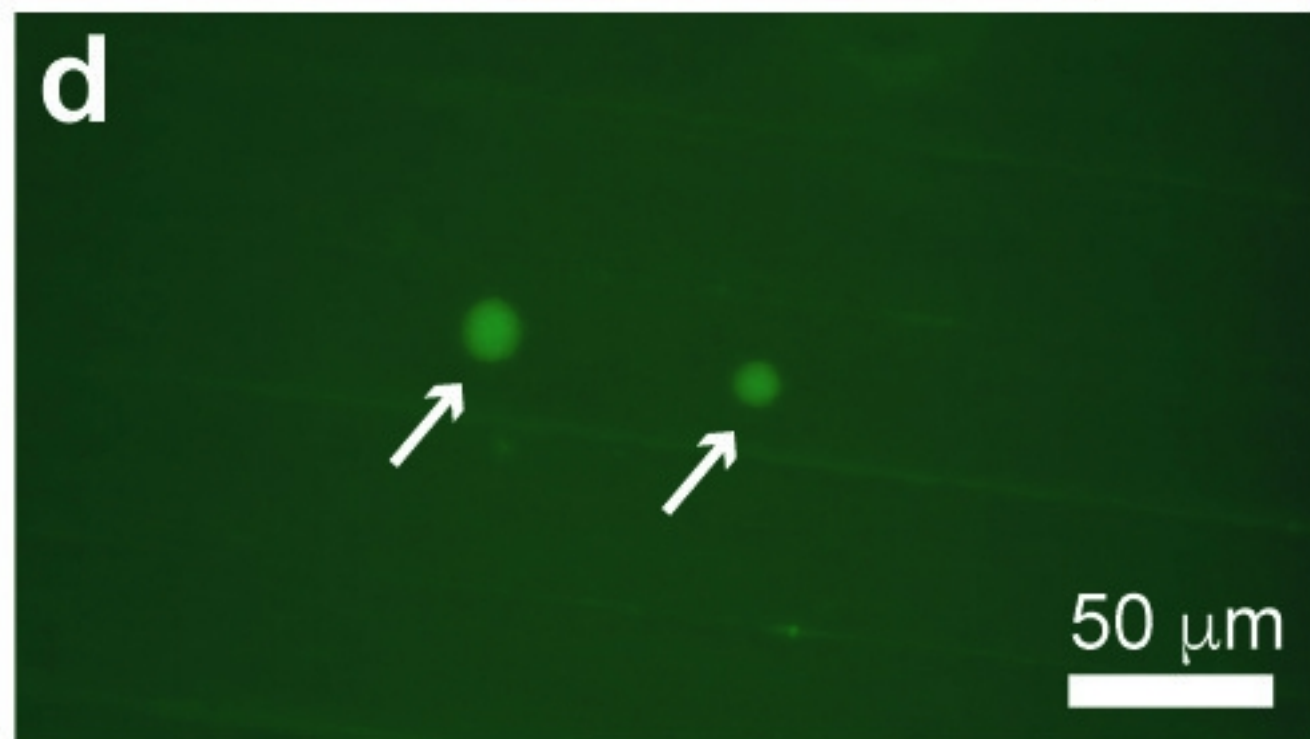

Figure 7

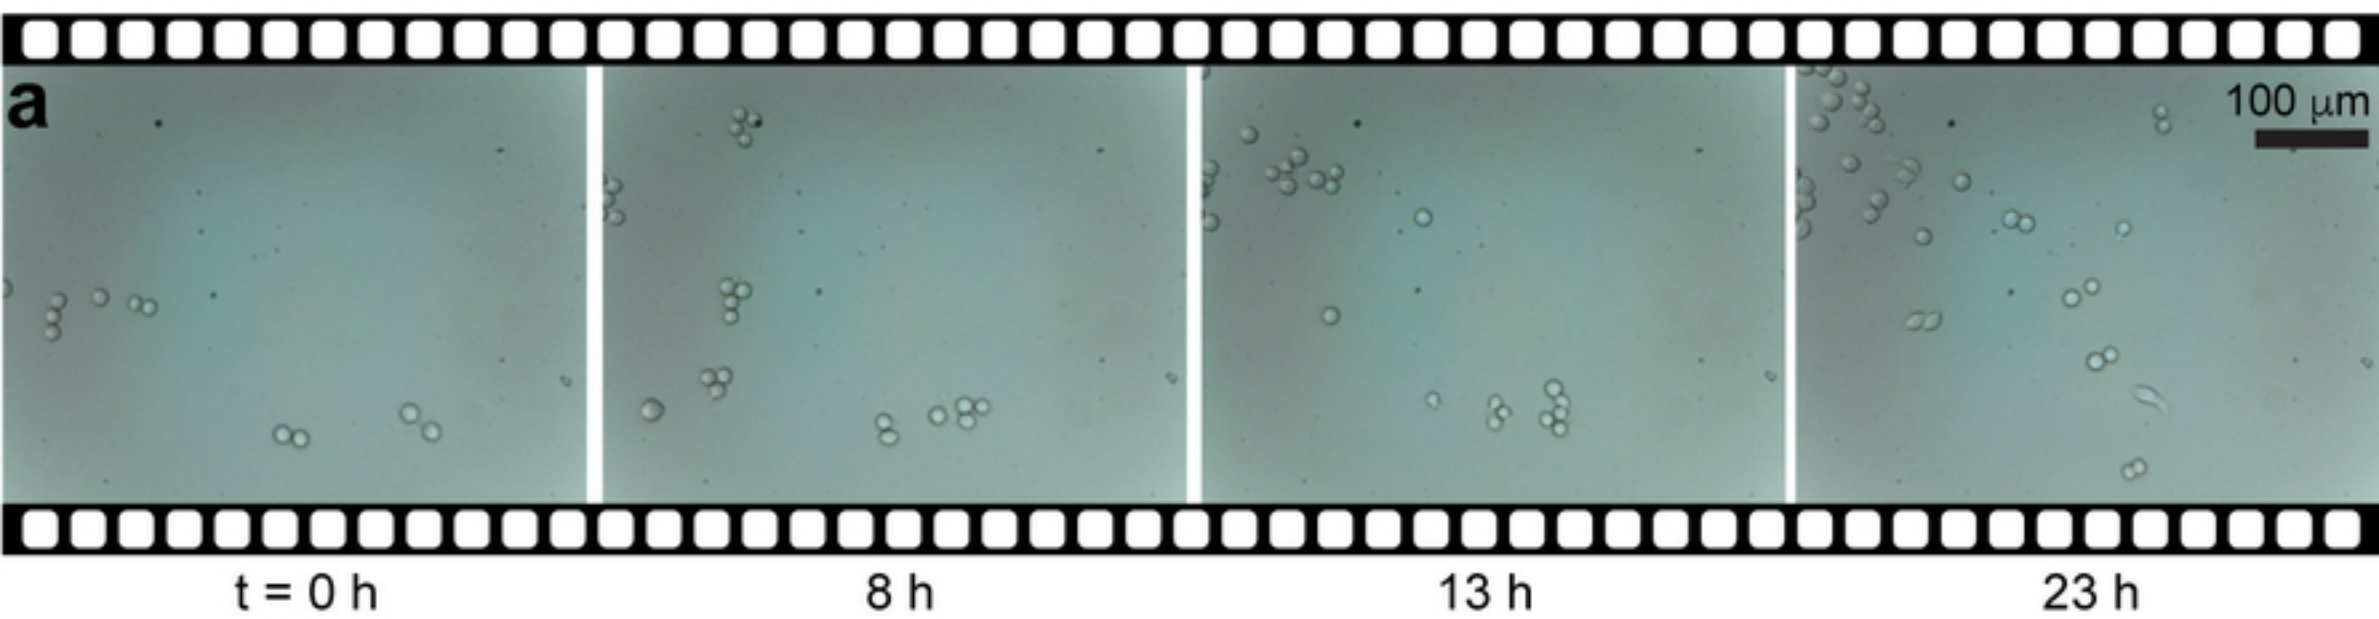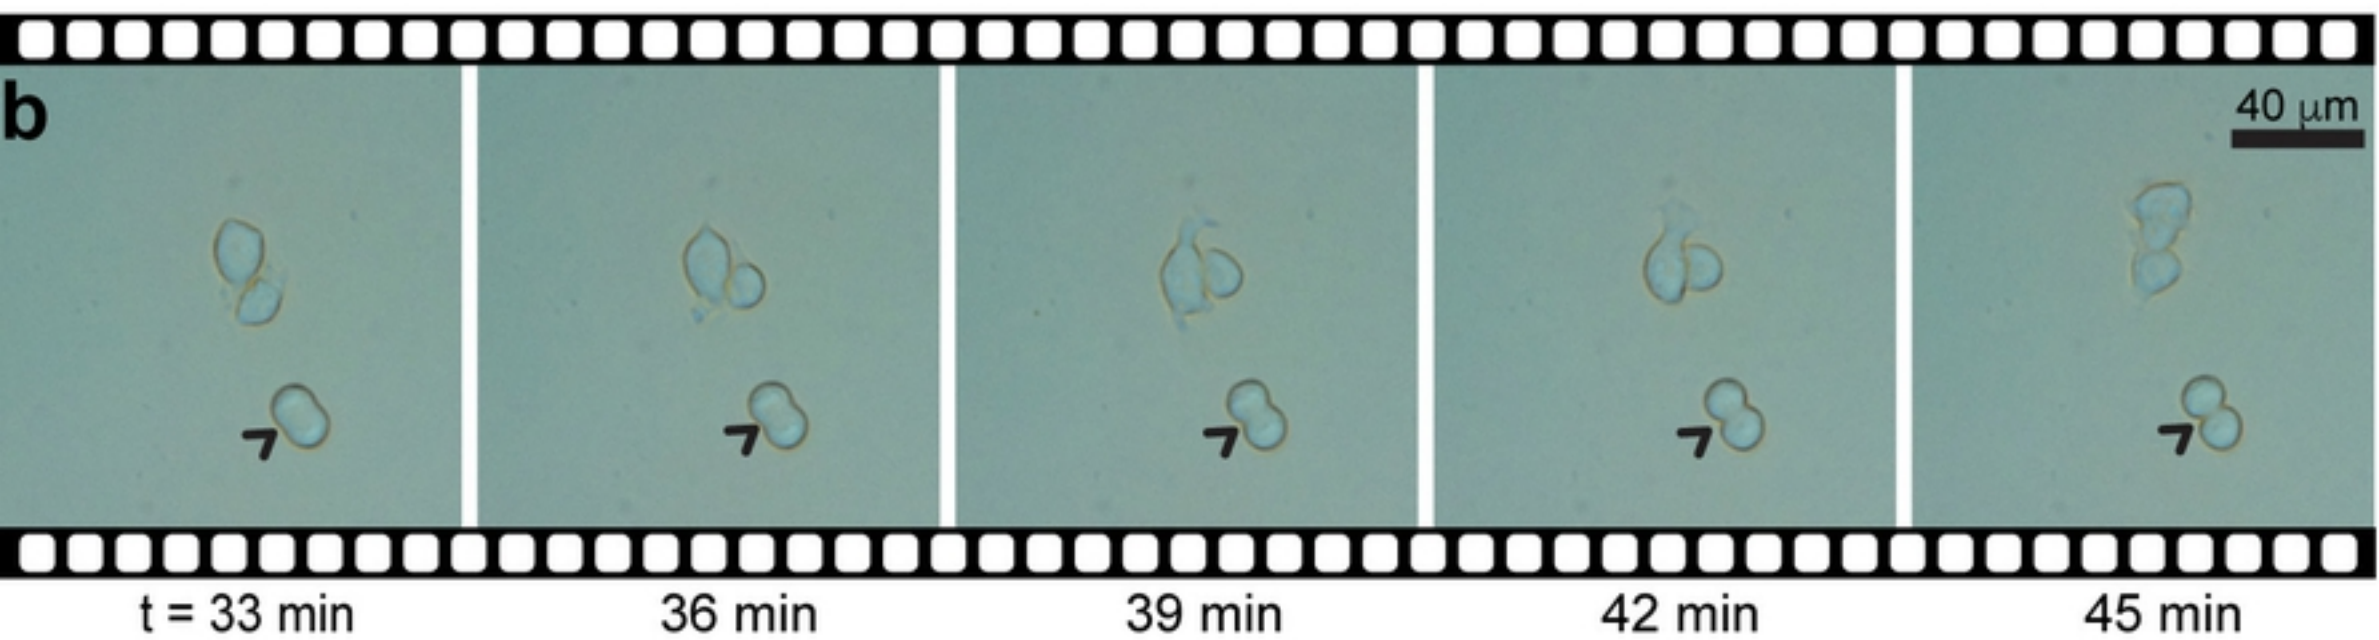

Figure 8
